# Supplementary material for: Single-molecule quantitation of RNA-binding protein occupancy and stoichiometry defines a role for Yra1 (Aly/REF) in nuclear mRNP organization
Source: PubMed Central journal article supplement (PMC10841842; doi:10.1016/j.celrep.2023.113415), 2023-11-14
Supplement: NIHMS1948227-supplement-1.pdf [file NIHMS1948227-supplement-1.pdf]

**Cell Reports, Volume 42**

**Supplemental information**

**Single-molecule quantitation of RNA-binding protein  
occupancy and stoichiometry defines a role  
for Yra1 (Aly/REF) in nuclear mRNP organization**

**Ryuta Asada, Andrew Dominguez, and Ben Montpetit**

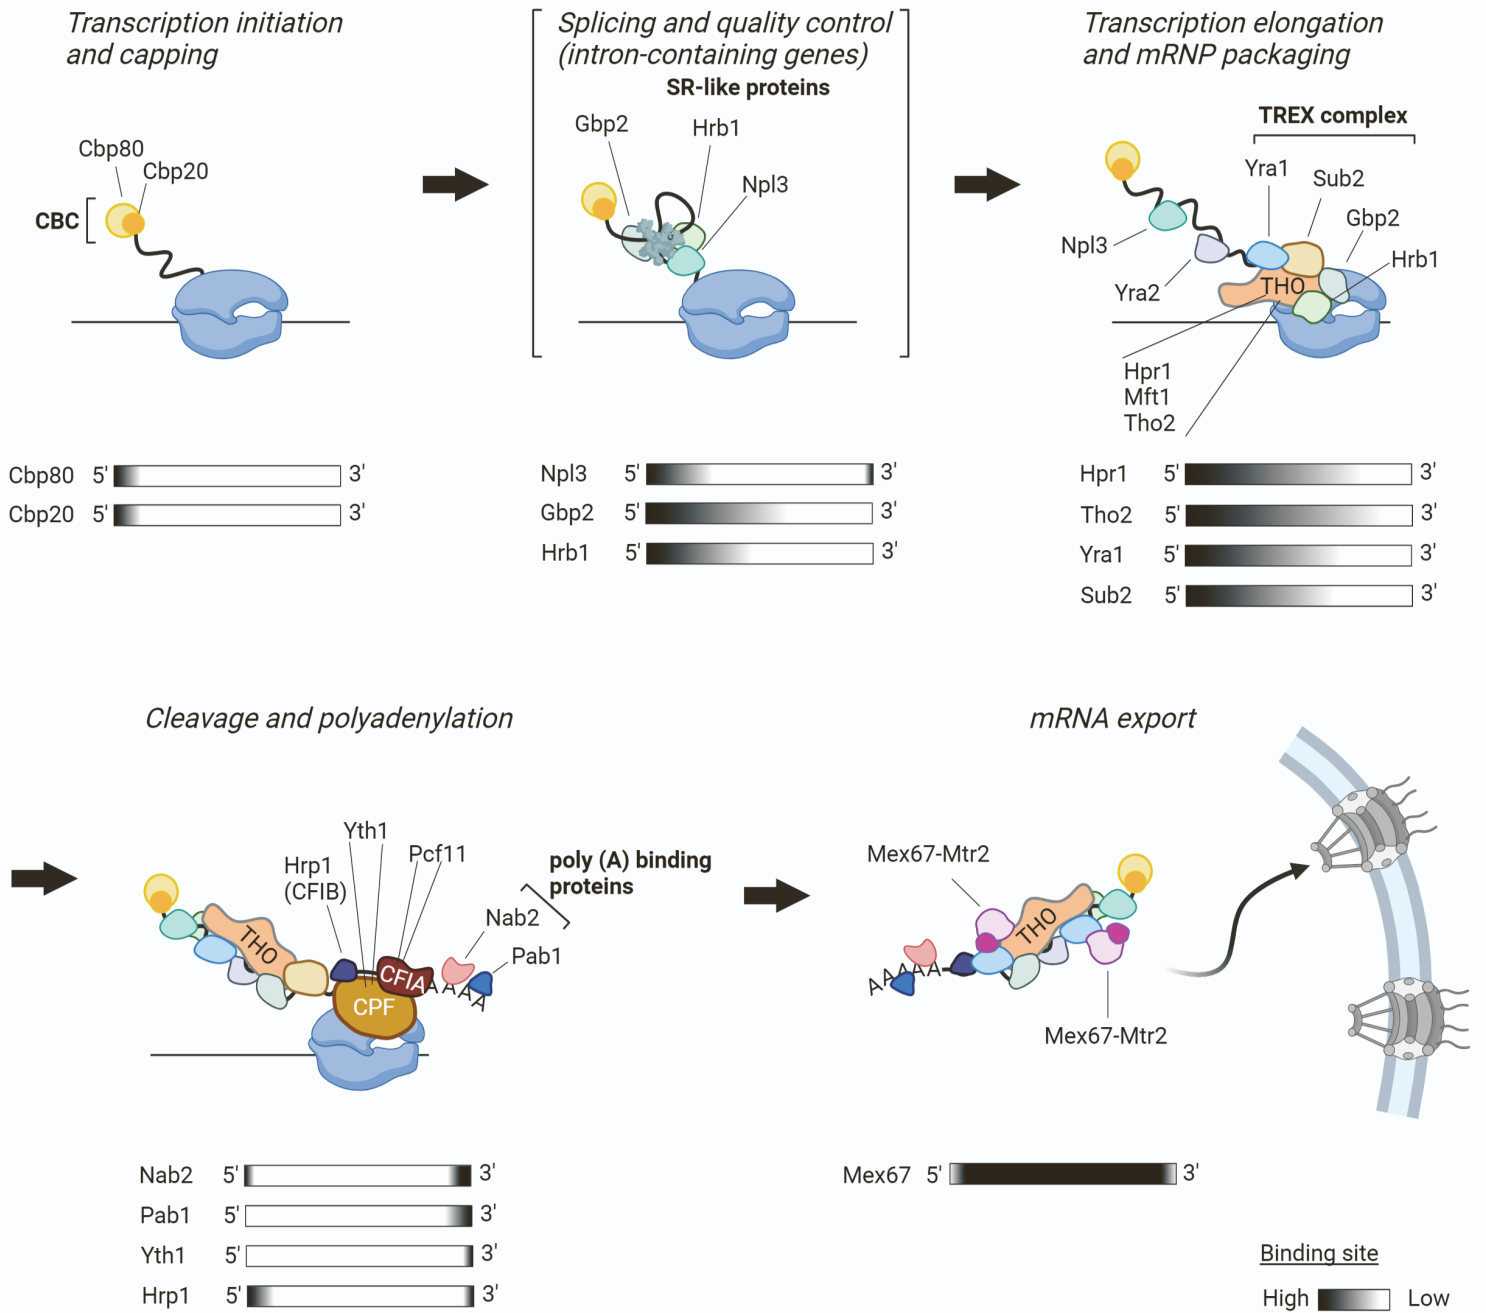

**Fig. S1. Currently proposed model for RBP recruitment and mRNP assembly in the mRNA biogenesis and export in yeast, related to introduction.** Upon transcription, the nuclear cap binding complex (CBC) composed of a Cbp80 and Cbp20 heterodimer [S1] recognizes the 5' cap early in transcription to protect the mRNA and further influence downstream events [S2]. The multi-functional SR-like protein, Npl3, promotes splicing, transcription elongation, 3' end formation, influences recruitment and binding of other RBPs during nuclear mRNP assembly [S3–9]. The other SR-like proteins, Gbp2 and Hrb1, are involved in splicing quality control and facilitate the export of properly spliced mRNAs [S10]. The THO complex (composed of Tho2, Hpr1, Mft1, Thp2 and Tex1) is recruited in response to phosphorylation of the RNA polymerase II (Pol II) c-terminal domain (CTD) to facilitate transcription elongation and recruitment of the DEAD-box ATPase Sub2 and mRNA export adaptor protein Yra1 to form the TRanscription and EXport (TREX) complex [S11–17]. SR-like proteins, Gbp2 and Hrb1, are also recruited to the mRNA via the interaction with TREX complex [S18]. Yra1 has a paralog, Yra2, which can complement the lethality of Yra1 deletion when overexpressed [S19]. Events of 3' processing are coordinated by the cleavage and polyadenylation factor (CPF) complex, cleavage factor IA (CFIA) complex and cleavage factor IB (CFIB, Hrp1) [S20]. The poly(A)-RNA binding proteins Nab2 and Pab1 are further involved in polyA-tail length control during this reaction [S21]. Of these, TREX components (Hpr1 and Yra1), the SR-like proteins (Npl3, Gbp2 and Hrb1), and Nab2 act as adaptor proteins to recruit the conserved Mex67-Mtr2 (NXF1/TAP-p15 in humans) mRNA export receptor that is responsible for mRNP export through NPCs [S10,16,22–27]. Bars at the bottom of the cartoon represents binding location averaged across the transcriptome as detected by CRAC and PAR-CLIP data [S28,29]. Although model proposed basic factors and their binding sites, it is unclear the actual composition of individual mRNPs and the compositional variation among the genes and different conditions.

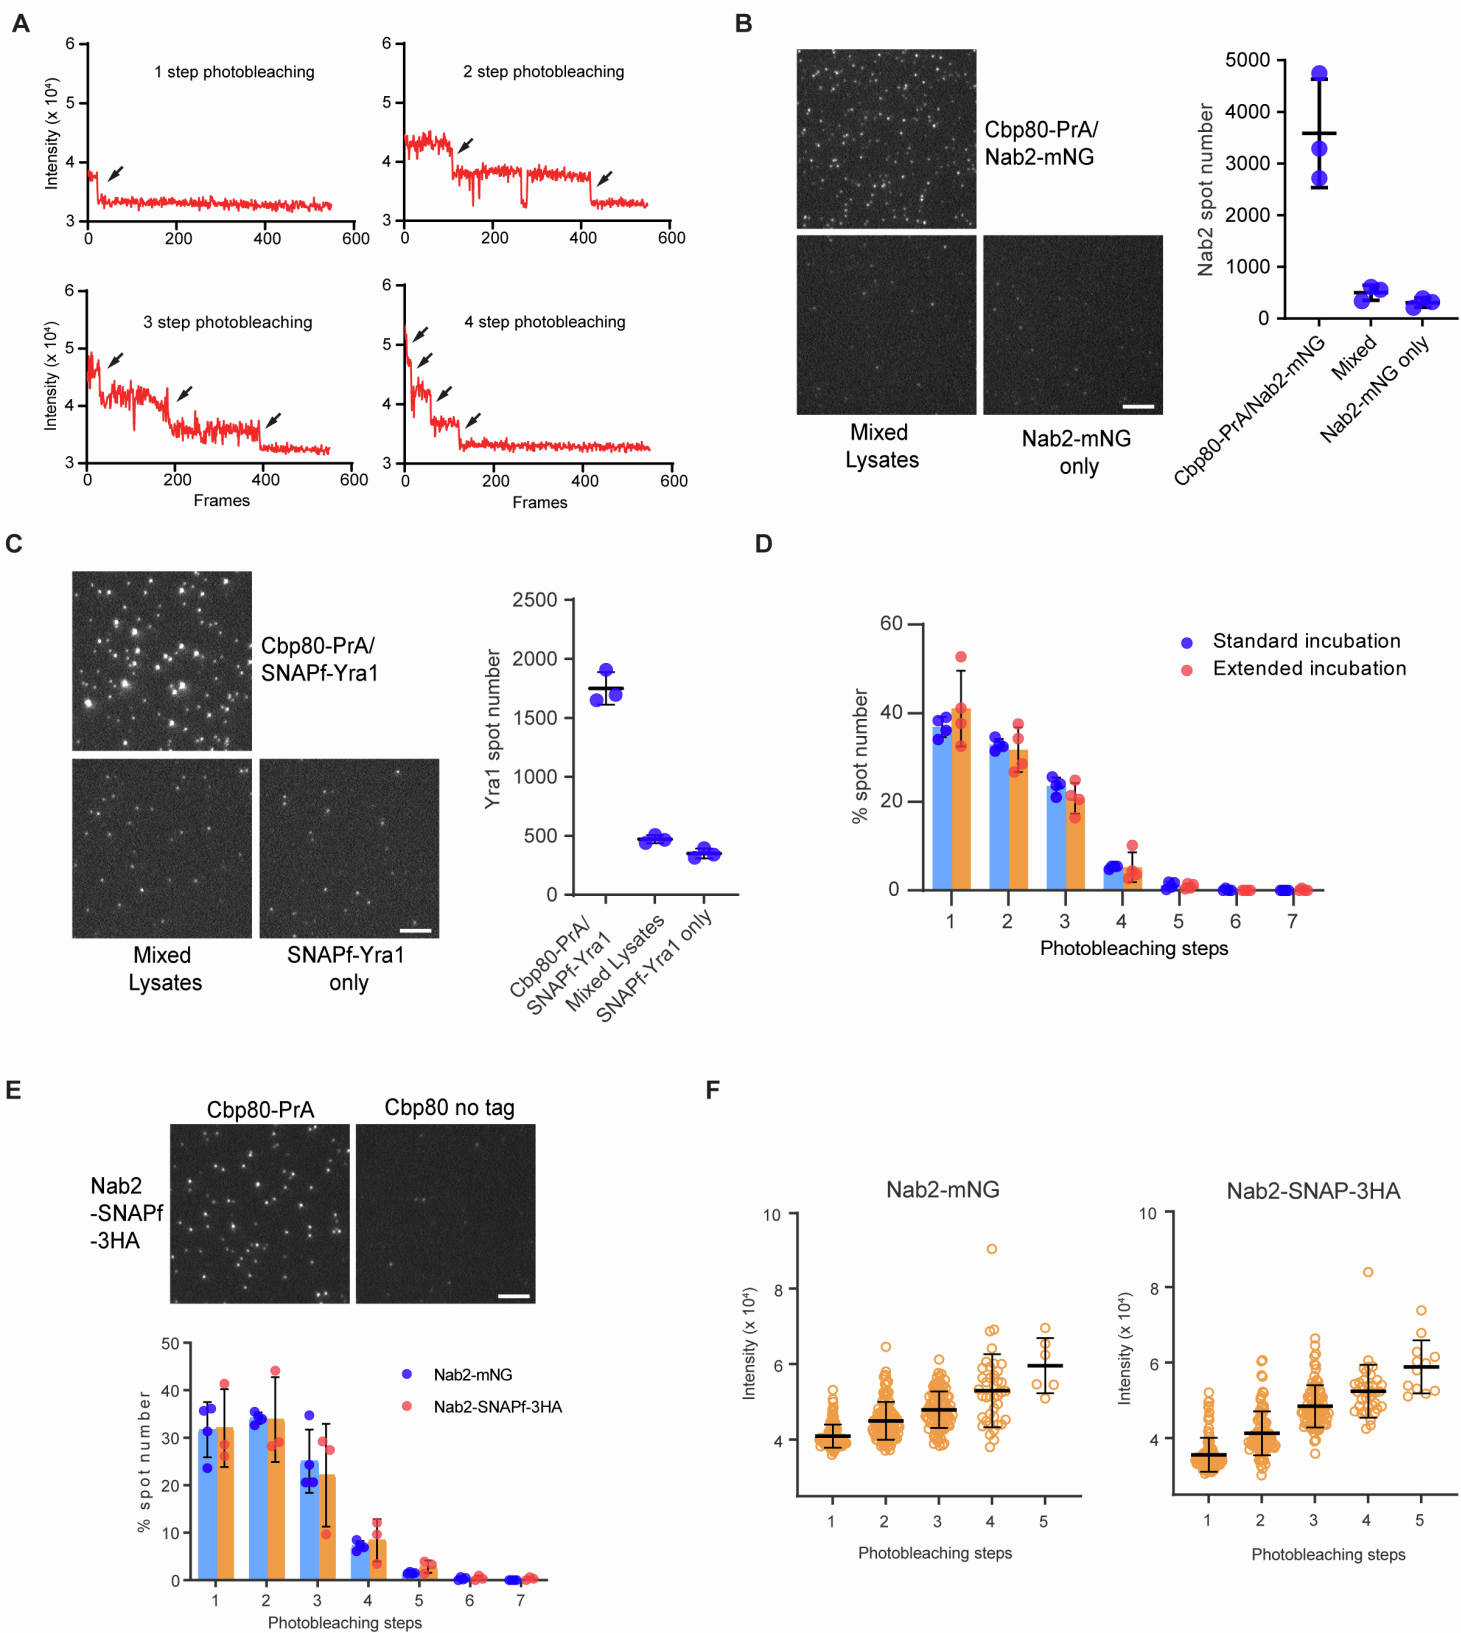



**Fig. S2. Validation of mRNP-SiMPull as a method to characterize *in vivo* mRNP architectures, related to Figure 1.** (A) Examples of spot intensity traces during photobleaching step analysis with photobleaching events indicated by black arrows. (B) Representative TIRF images of Nab2-mNG obtained by mRNP-SiMPull using input sample from a strain that co-expresses Cbp80-PrA and Nab2-mNG, a Nab2-mNG strain (untagged CBP80), and input made from mixing lysate from two strains individually tagged for Cbp80-PrA and Nab2-mNG. Pulldown was performed by IgG-beads followed by mRNP capturing via mNG antibody on the glass surface. Graph shows the number of detected spots in triplicate experiments with mean and standard deviation (error bar). (C) Representative TIRF images of SNAPf-Yra1 obtained by mRNP-SiMPull as described in B. Pulldown was performed by IgG-beads followed by mRNP capturing via Yra1 antibody on the glass surface. Graph shows the number of detected spots in triplicate experiments with mean and standard deviation (error bar). (D) Photobleaching step analysis of Nab2-mNG spots detected in a normally processed sample (~50 min from lysis to imaging) versus a sample subject to an extended incubation. Graph displays the percent of spots detected for each photobleaching step in triplicate experiments with mean and standard deviation (error bar). (E) Representative TIRF images of Nab2-SNAPf-3HA obtained by mRNP-SiMPull. Pulldown was performed by IgG-beads followed by mRNP capturing via HA antibody on the glass surface. Graph shows photobleaching step analysis of Nab2-mNG (also shown in Fig. 3C) vs. Nab2-SNAPf-3HA in a Cbp80 pulldown. Bars show mean data with standard deviation with dots showing individual data points in triplicate experiments. (F) Graphs display spot intensity measurements for Nab2-mNG and Nab2-SNAPf-3HA spots that were determined by photobleaching step analysis to have 1 – 5 molecules present. Mean and standard deviation are shown. Image scale bars, 5  $\mu$ m.

A

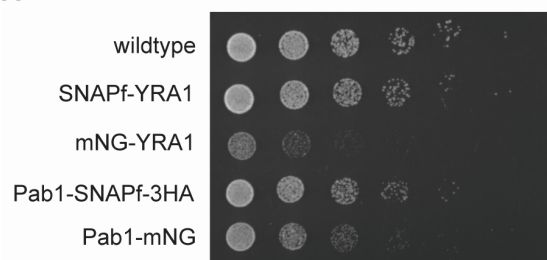B RBP-mNG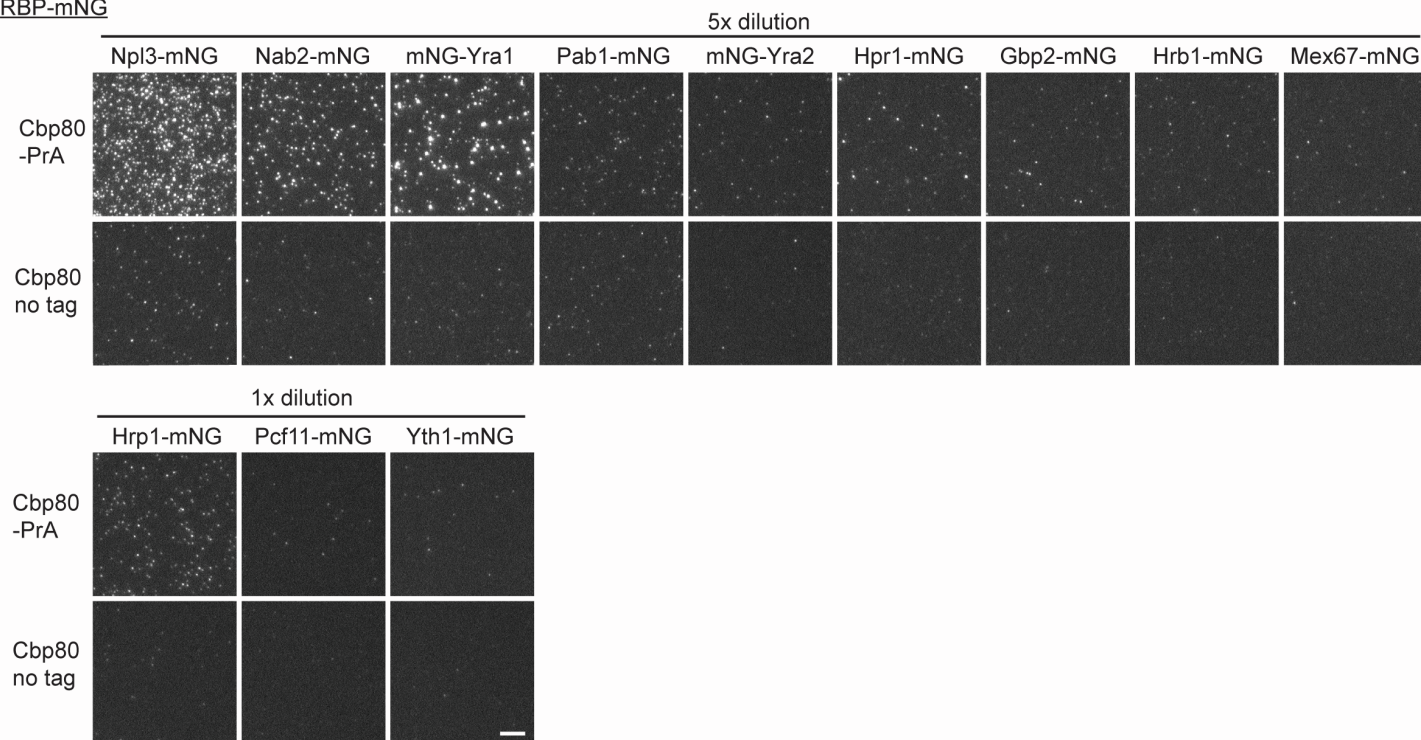Cbp20-SNAPf-3HA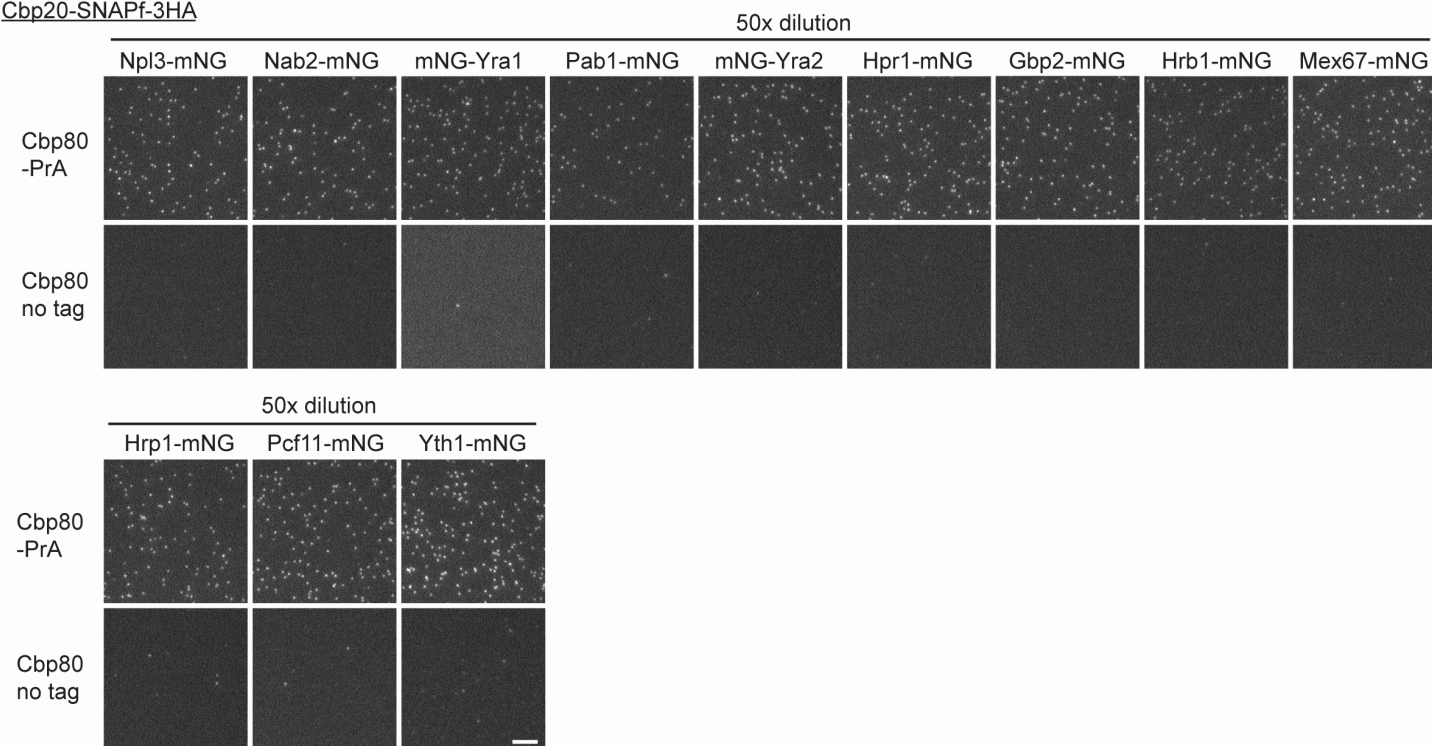

**Fig. S3. Occupancy rate analysis of mNG tagged RBPs in Cbp80 pulldown by mRNP-SiMPull, related to Figure 2.** (A) Yeast spot growth assay showing growth effects caused by fusion of mNG to Yra1 and Pab1 in comparison to SNAP tagging. (B) Representative TIRF images used to determine the frequency of target RBP containing mRNPs in the population of total Cbp80 bound mRNPs. mRNP-SiMPull was performed with tagged Cbp80-PrA and untagged Cbp80 strains that have the indicated mNG tagged RBP and SNAPf-3HA tagged Cbp20. Indicated dilution rate of IP-elution was loaded on the glass slide in two independent lanes which were coated with mNG and HA antibody, respectively. Scale bar, 5  $\mu\text{m}$ .

● RNase -      ● RNase +

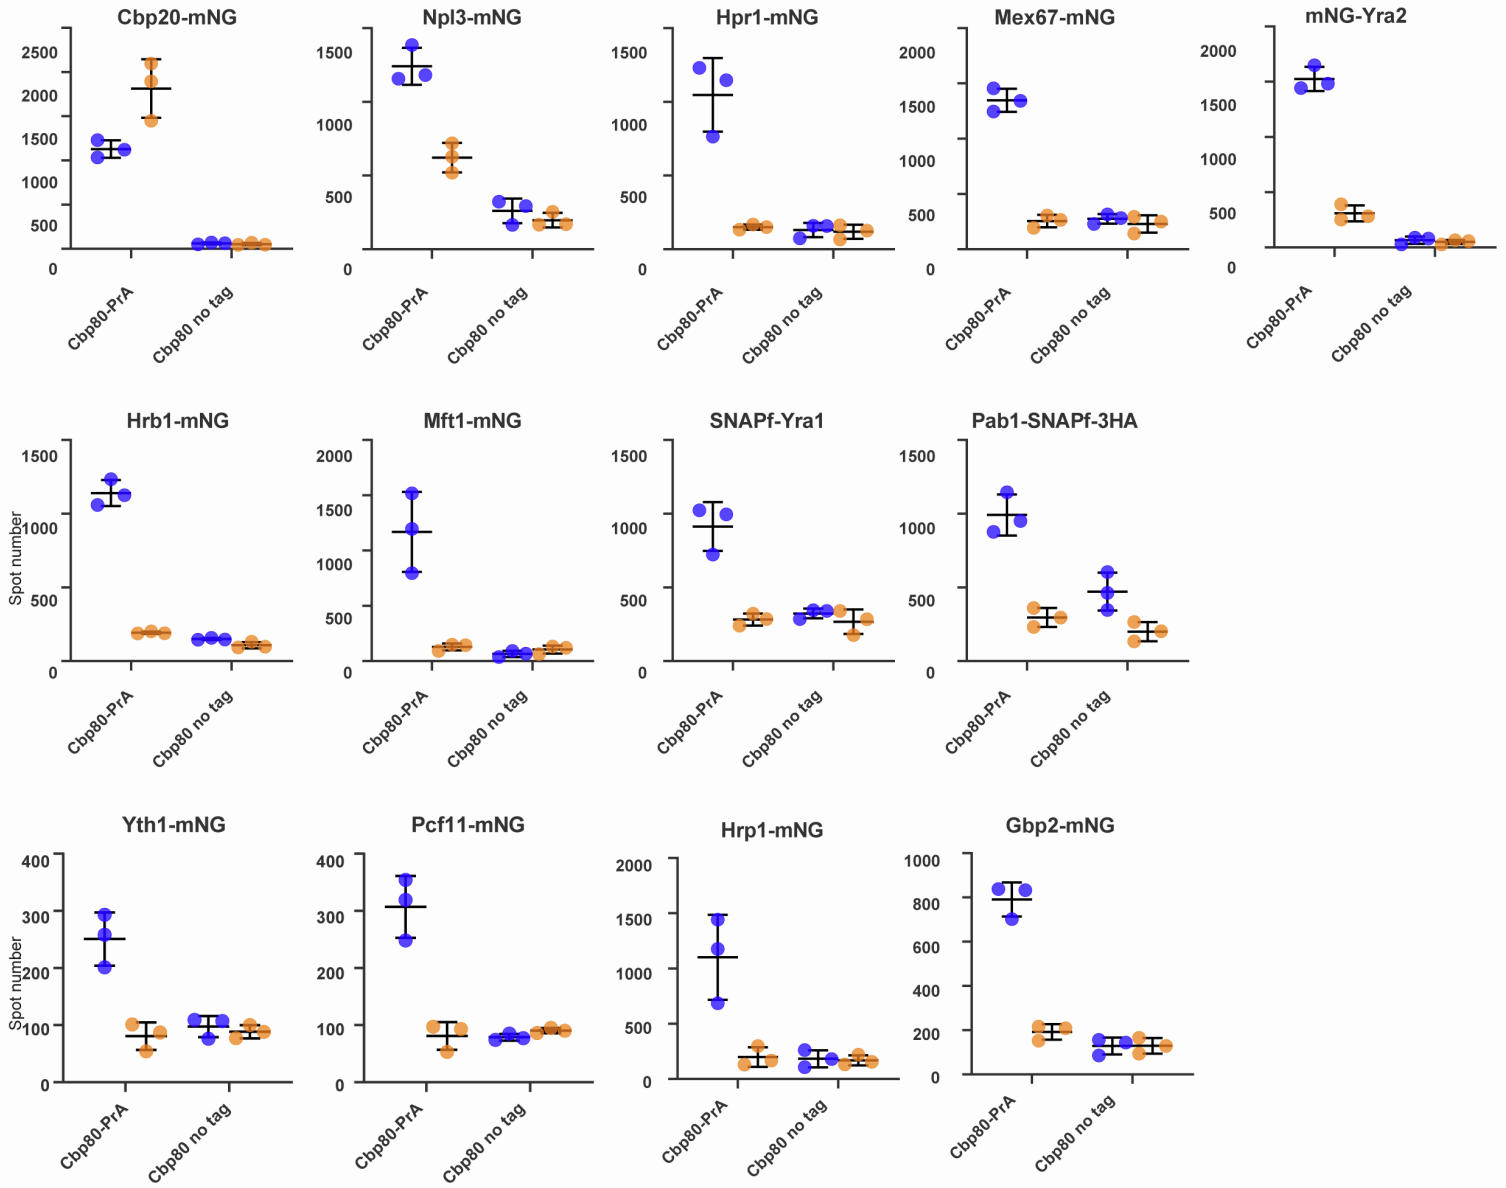

**Fig. S4. RNase sensitivity of mRNP components, related to Figure 3.** Graph shows the number of detected spots by mRNP-SiMPull for the indicated RBP with tagged and untagged Cbp80 in triplicate experiments with and without RNase A treatment. Mean and standard deviation (error bar) are indicated by the black bars.



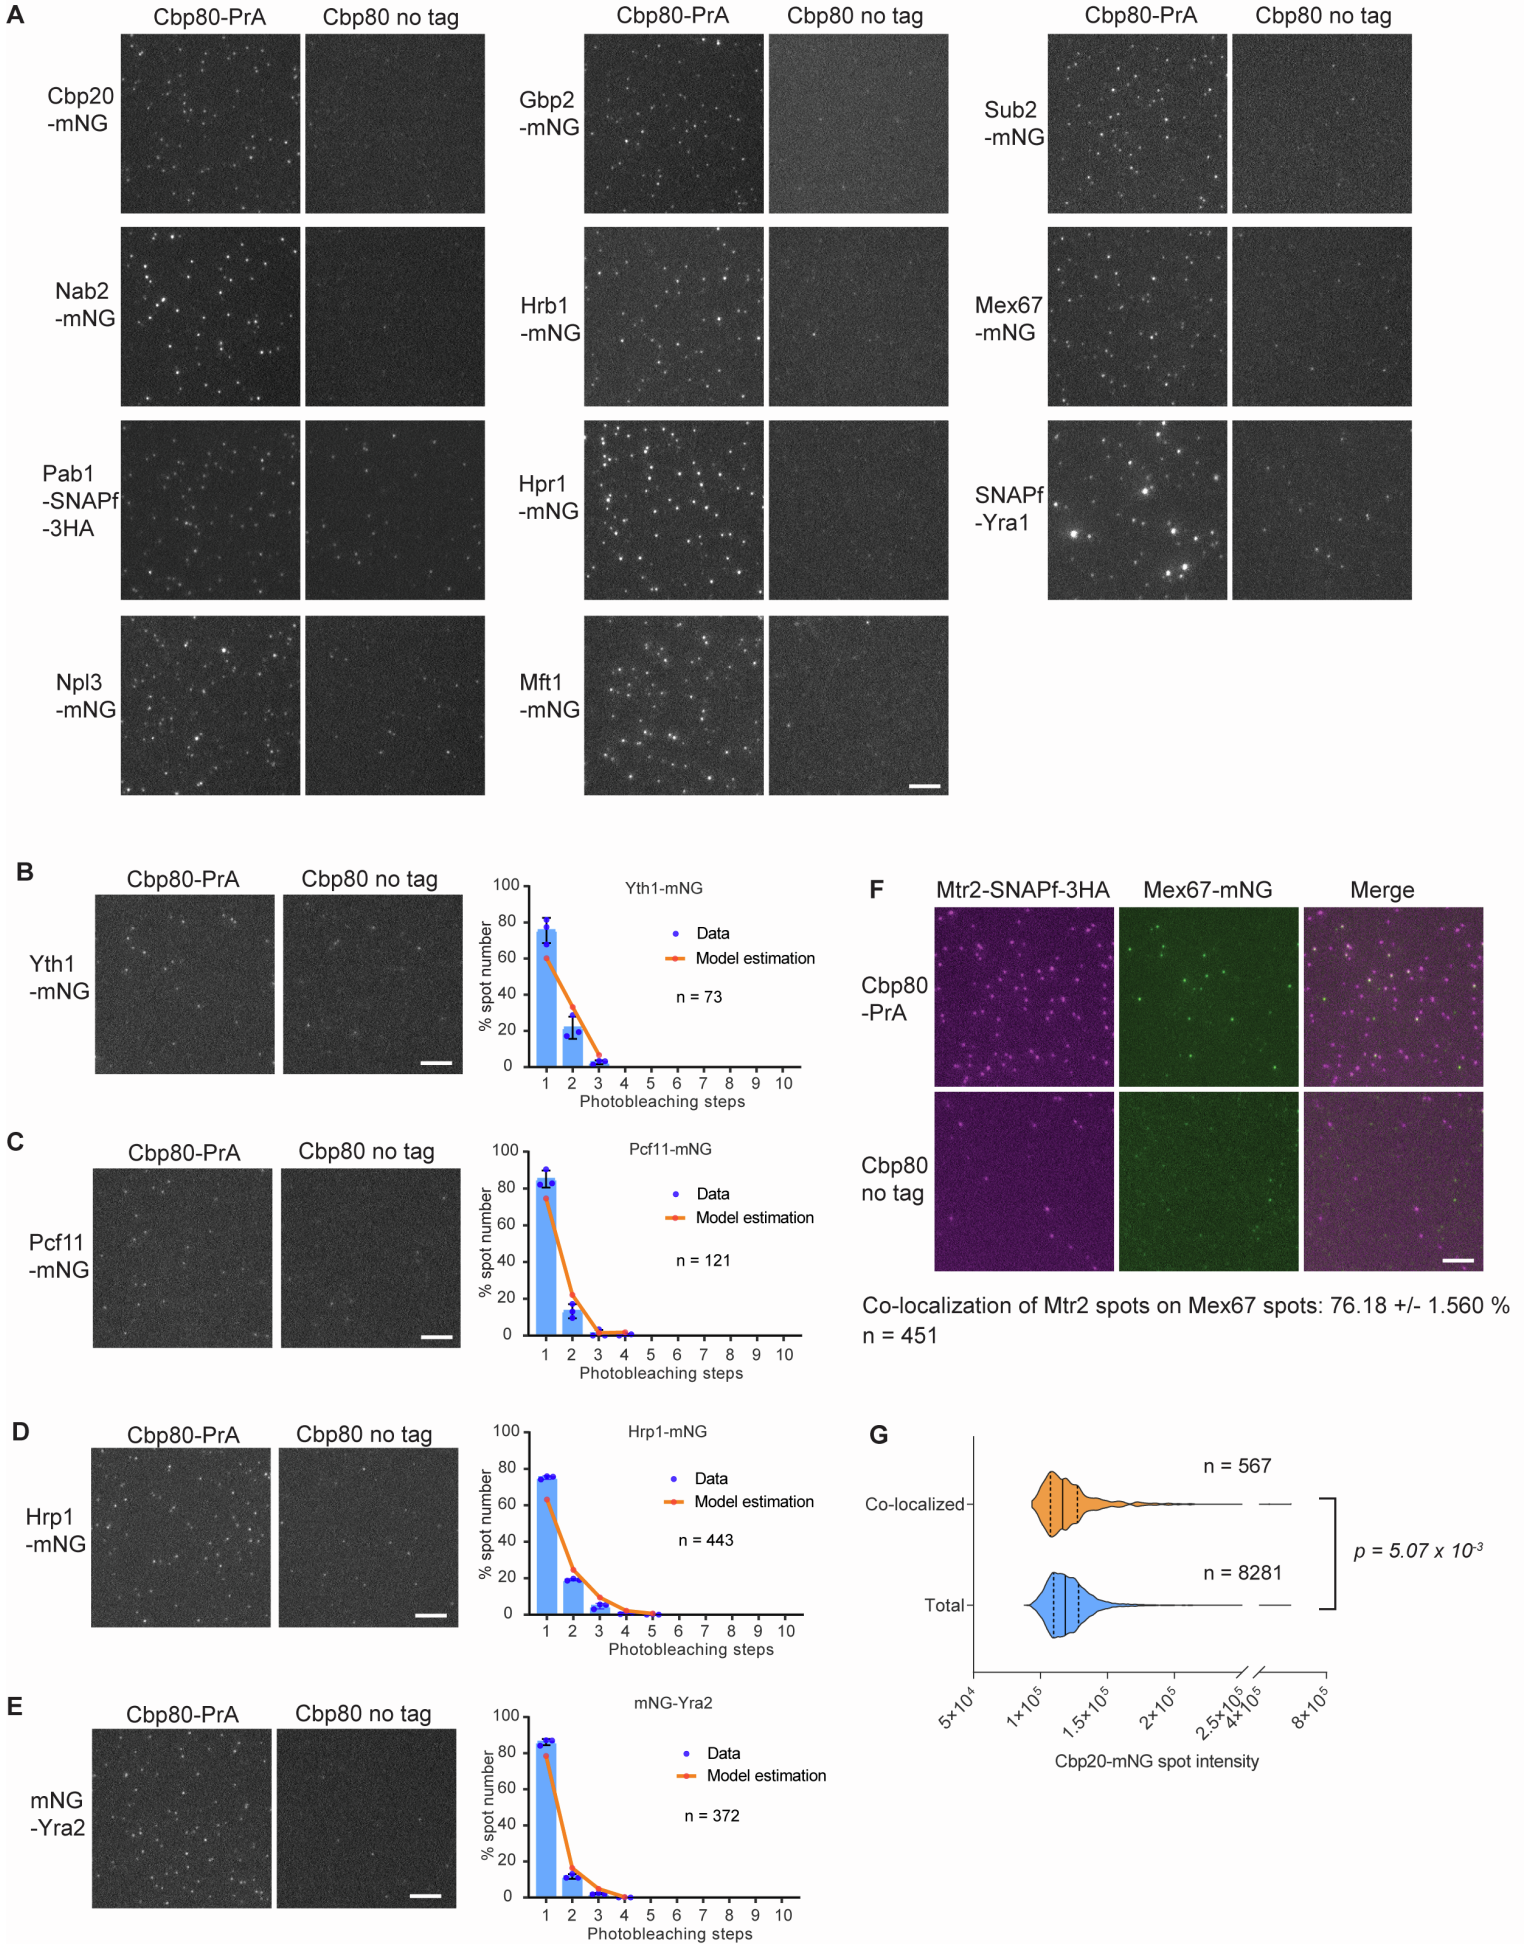

**Fig. S5. Nuclear mRNP composition by photobleaching and co-localization analysis, related to Figure 3.** (A) Representative TIRF images of target RBPs obtained by mRNP-SiMPull from cell lysates co-expressing Cbp80-PrA (also shown in Figure 3) or an untagged Cbp80. (B-E) Stoichiometry analysis of cleavage and polyadenylation factors Yth1, Pcf11 and Hrp1 and Yra1 paralog Yra2 as described in Fig. 3. Average number (n) of spots analyzed per replicate experiment is indicated on each graph. (F) Single molecule co-localization analysis between Mex67-mNG and Mtr2-SNAPf-3HA in Cbp80 pulldown. Mean and standard deviation for percent co-localization of Mtr2 spots with all detected Mex67 spots in three replicates are shown. n indicates average number of spots analyzed per replicate experiment. (G) Comparison of Cbp20 spot intensities for Yra1 co-localized Cbp20 vs. all Cbp20 spots from imaging data shown in Fig. 4. Pooled triplicate data is shown in the violin plot with solid and dotted lines showing the median and quartile, respectively. n indicates pooled spot number analyzed. The statistically significant (Wilcoxon's rank sum test) reduction in Cbp20-mNG spot intensity for Yra1 co-localized population may reflect fluorescence resonance energy transfer (FRET) between the mNG and SNAP dye. Image scale bars, 5  $\mu$ m.

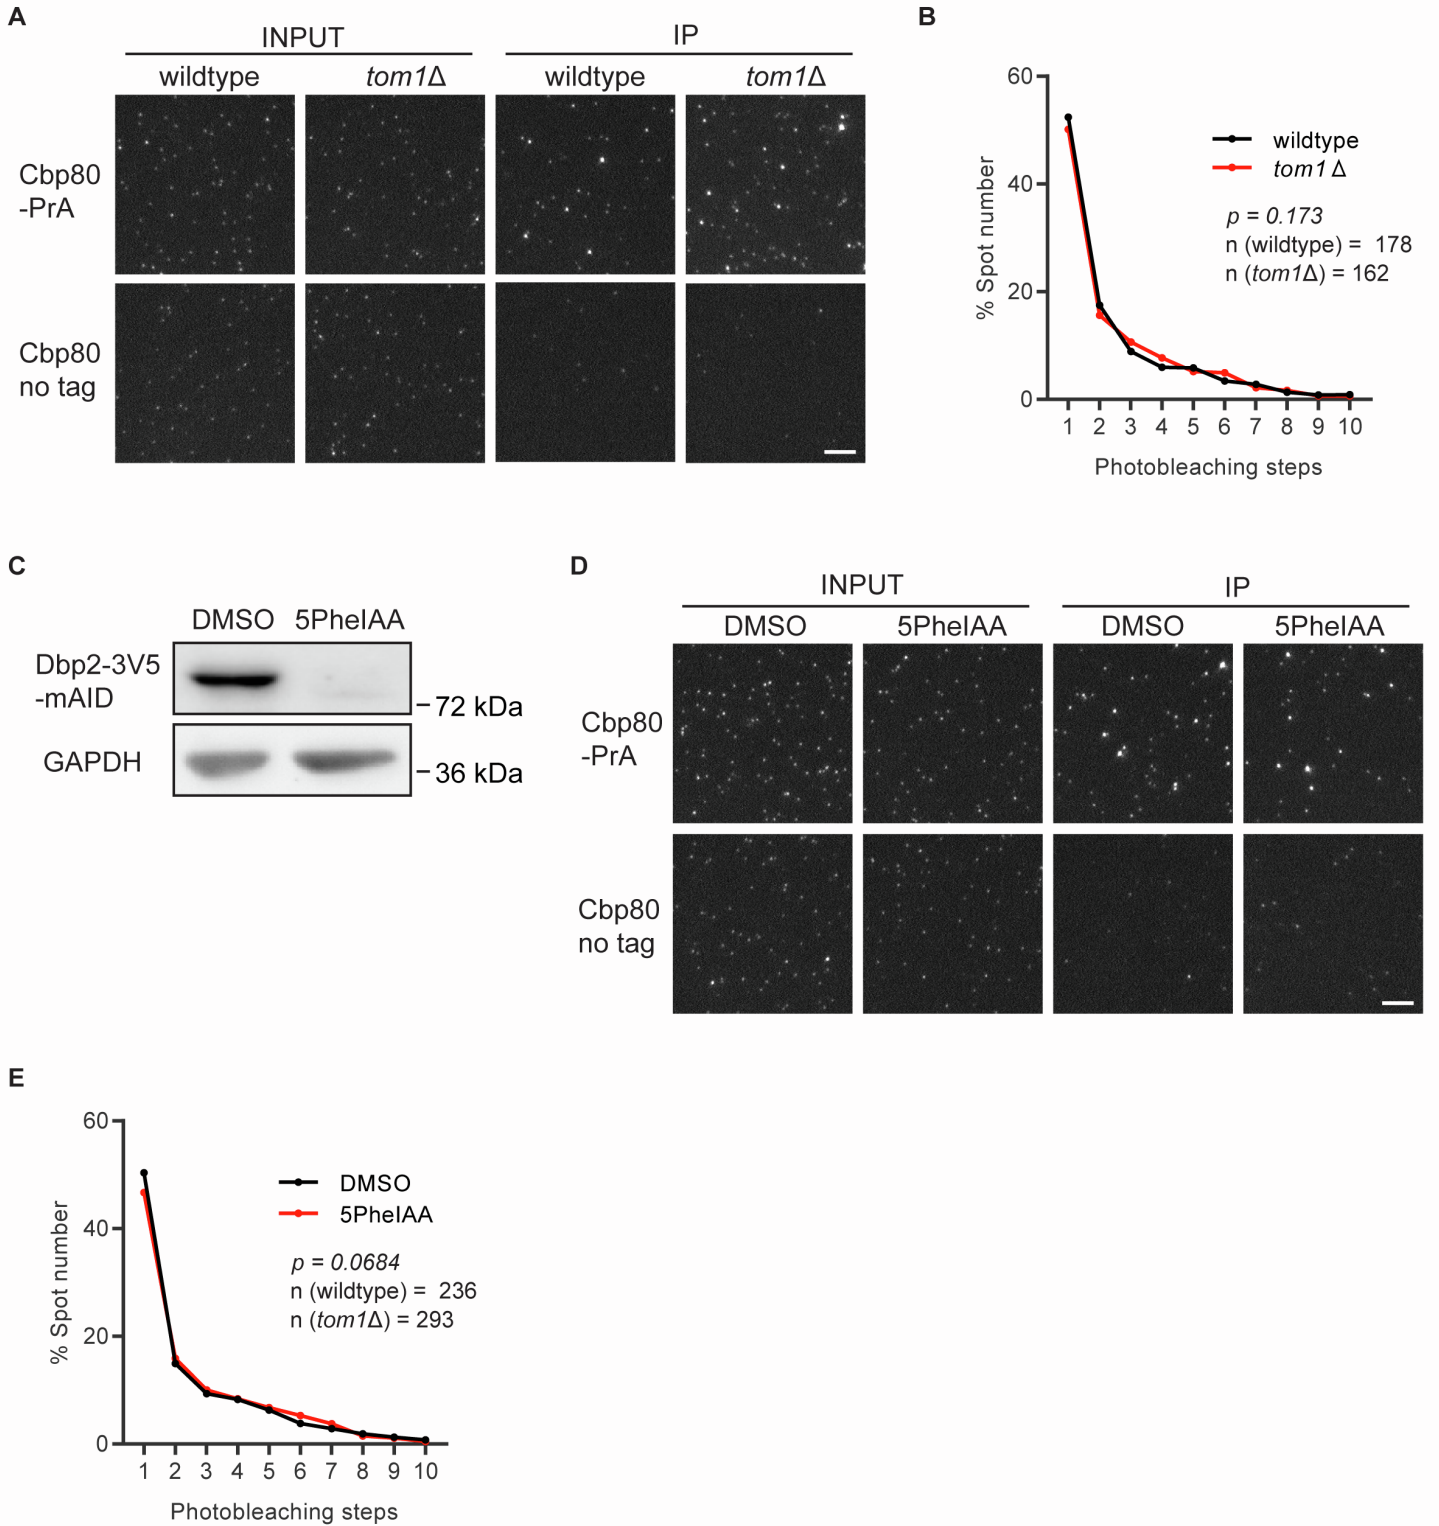



**Fig. S6. Stoichiometry measurement of SNAPf-Yra1 in *tom1Δ* and Dbp2 depletion strains, related to Figure 3.** Representative TIRF images of SNAPf-Yra1 used for stoichiometry analysis in (A) wildtype vs. *tom1Δ* and (D) control vs. Dbp2 depletion strains from mRNP-SiMPull. Images of INPUT (cell lysate) and IP (PrA pulldown) samples are shown. Line graphs show uncorrected raw mean photobleaching step data from triplicate experiments in (B) wildtype vs. *tom1Δ* and (E) control vs. Dbp2 depletion strains. p-values were calculated by a non-parametric Kolomogorov-Smirnoff [KS] two-sample test. Average number (n) of spots analyzed per replicate experiment is indicated on each graph. Image scale bars, 5 μm. (C) Western blotting with anti-V5 and anti-GAPDH demonstrates depletion of Dbp2-3V5-mAID protein upon addition of 1 μM 5PheIAA for 2 hours as compared to control (DMSO). Protein size marker position is indicated at right side.

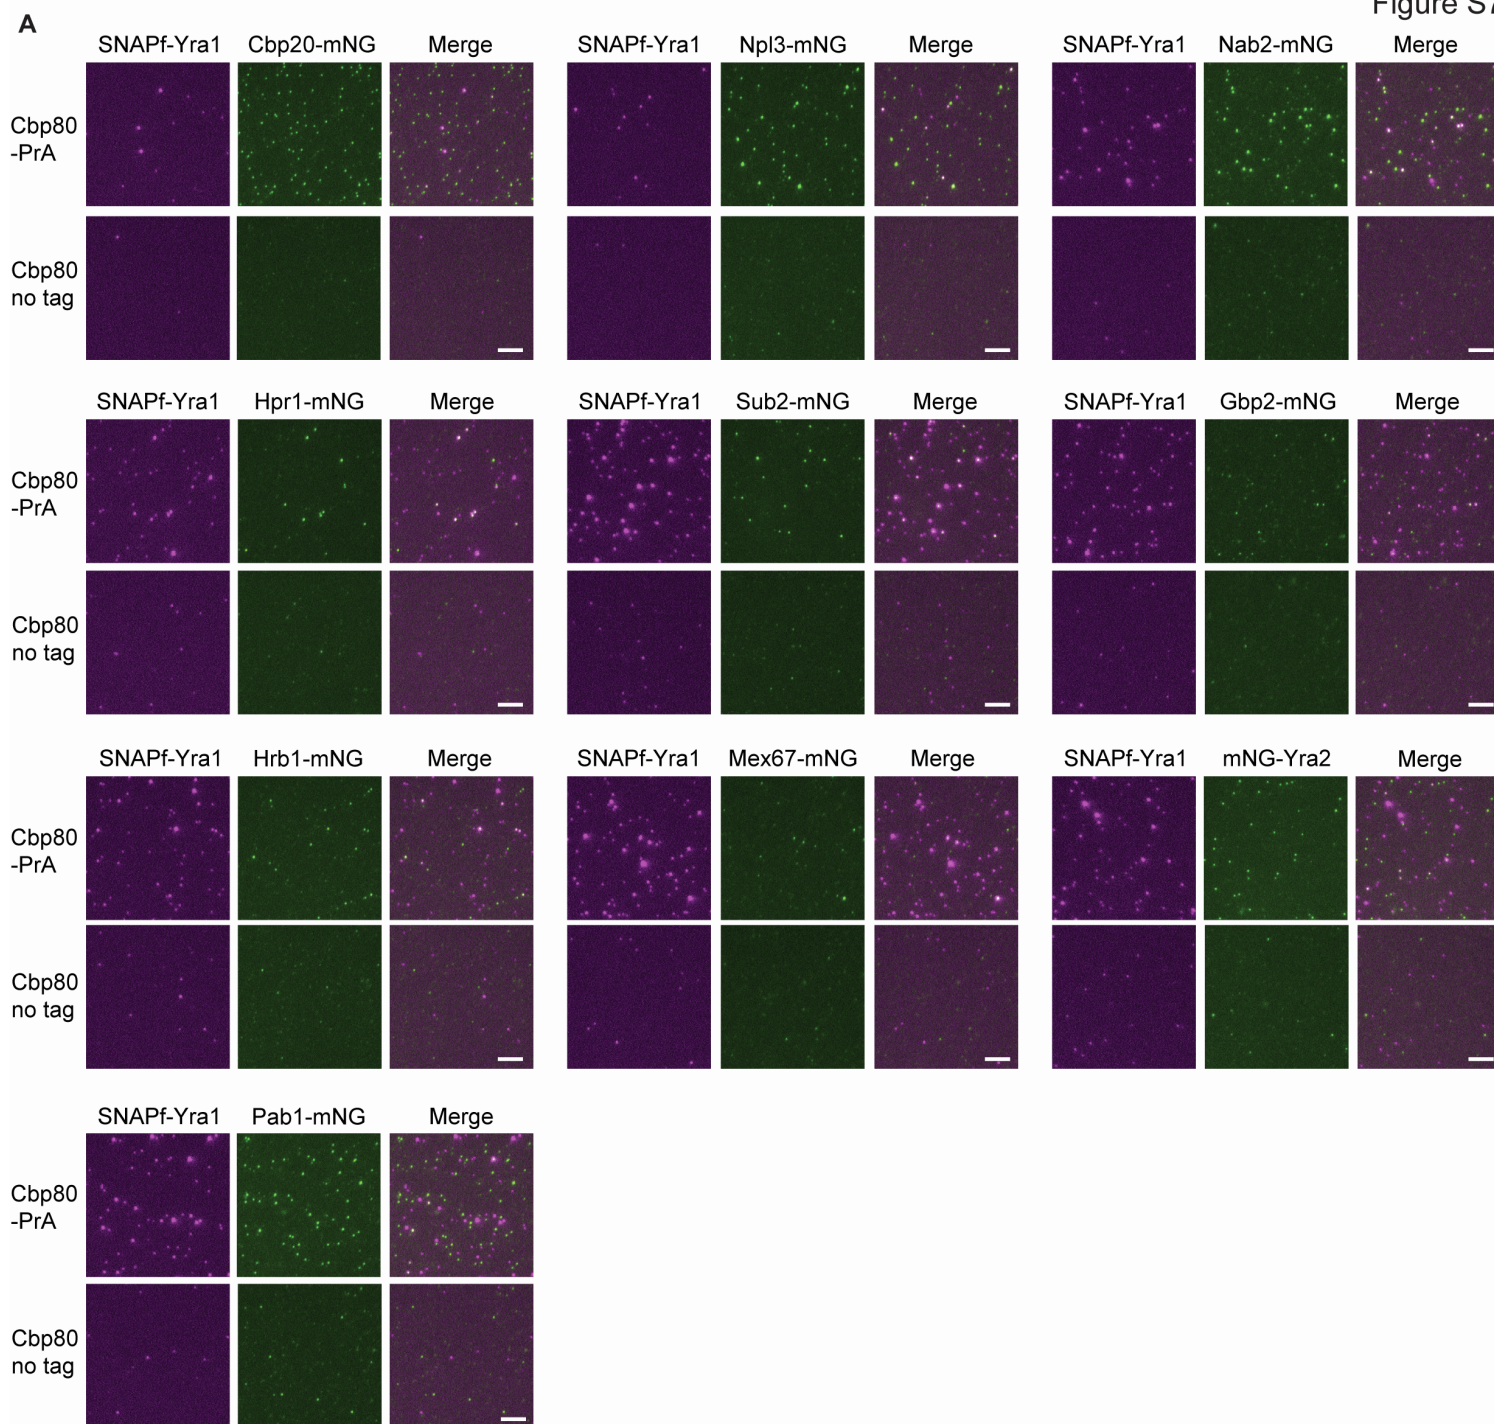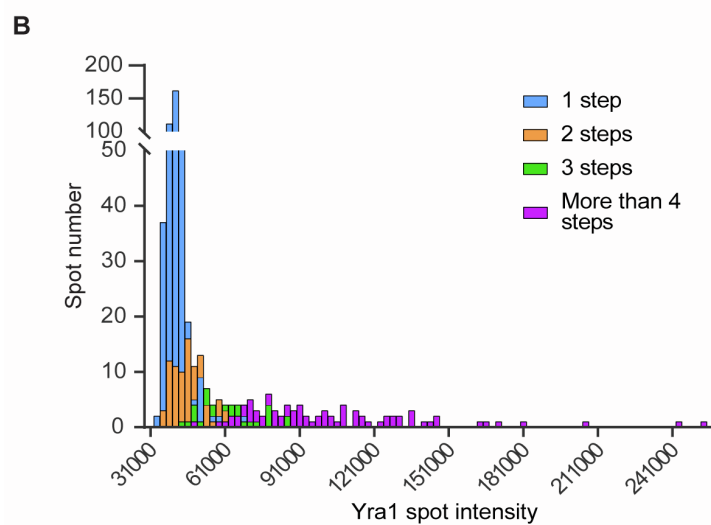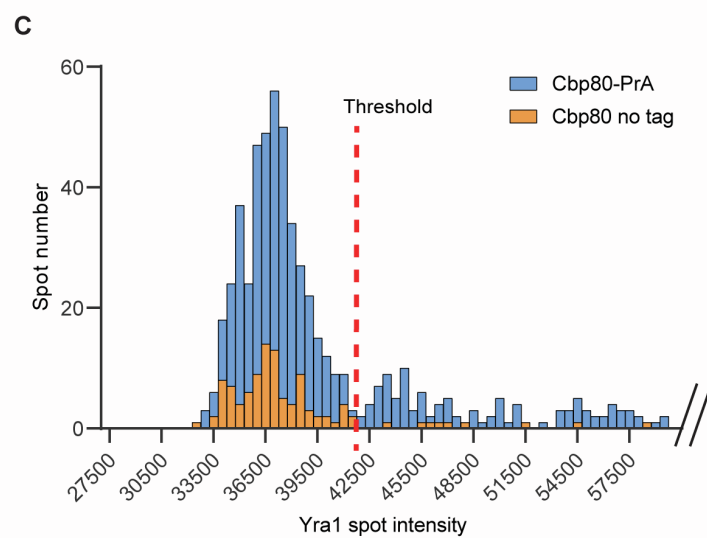

**Fig. S7. Determination of one vs. multiple Yra1 containing spots for RBP co-localization analysis, related to Figure 4.** (A) Representative TIRF images used for co-localization analysis between SNAPf-Yra1 and other mNG-tagged RBPs with mRNP-SiMPull showing both Cbp80 pulldown (also shown in Figure 4) and no tag controls. Image scale bars, 5  $\mu$ m. (B) Histogram of Yra1 spot intensity in the first frame of imaging color coded by the stoichiometry determined by photobleaching step analysis. More than 90% of spots in the low intensity peak are one step photobleached molecules. From these distributions, it is possible to separate “mostly one” and “multiple” Yra1 spots based on spot intensity. (C) Example of thresholding to separate one and multiple Yra1 spots. Histogram shows spot intensity distribution of total Yra1 spots in Cbp80-PrA and Cbp80 no tag control. Thresholding to separate low intensity peak from higher intensity tail allows for identification of spots with “mostly one” and “multiple” copies of Yra1.

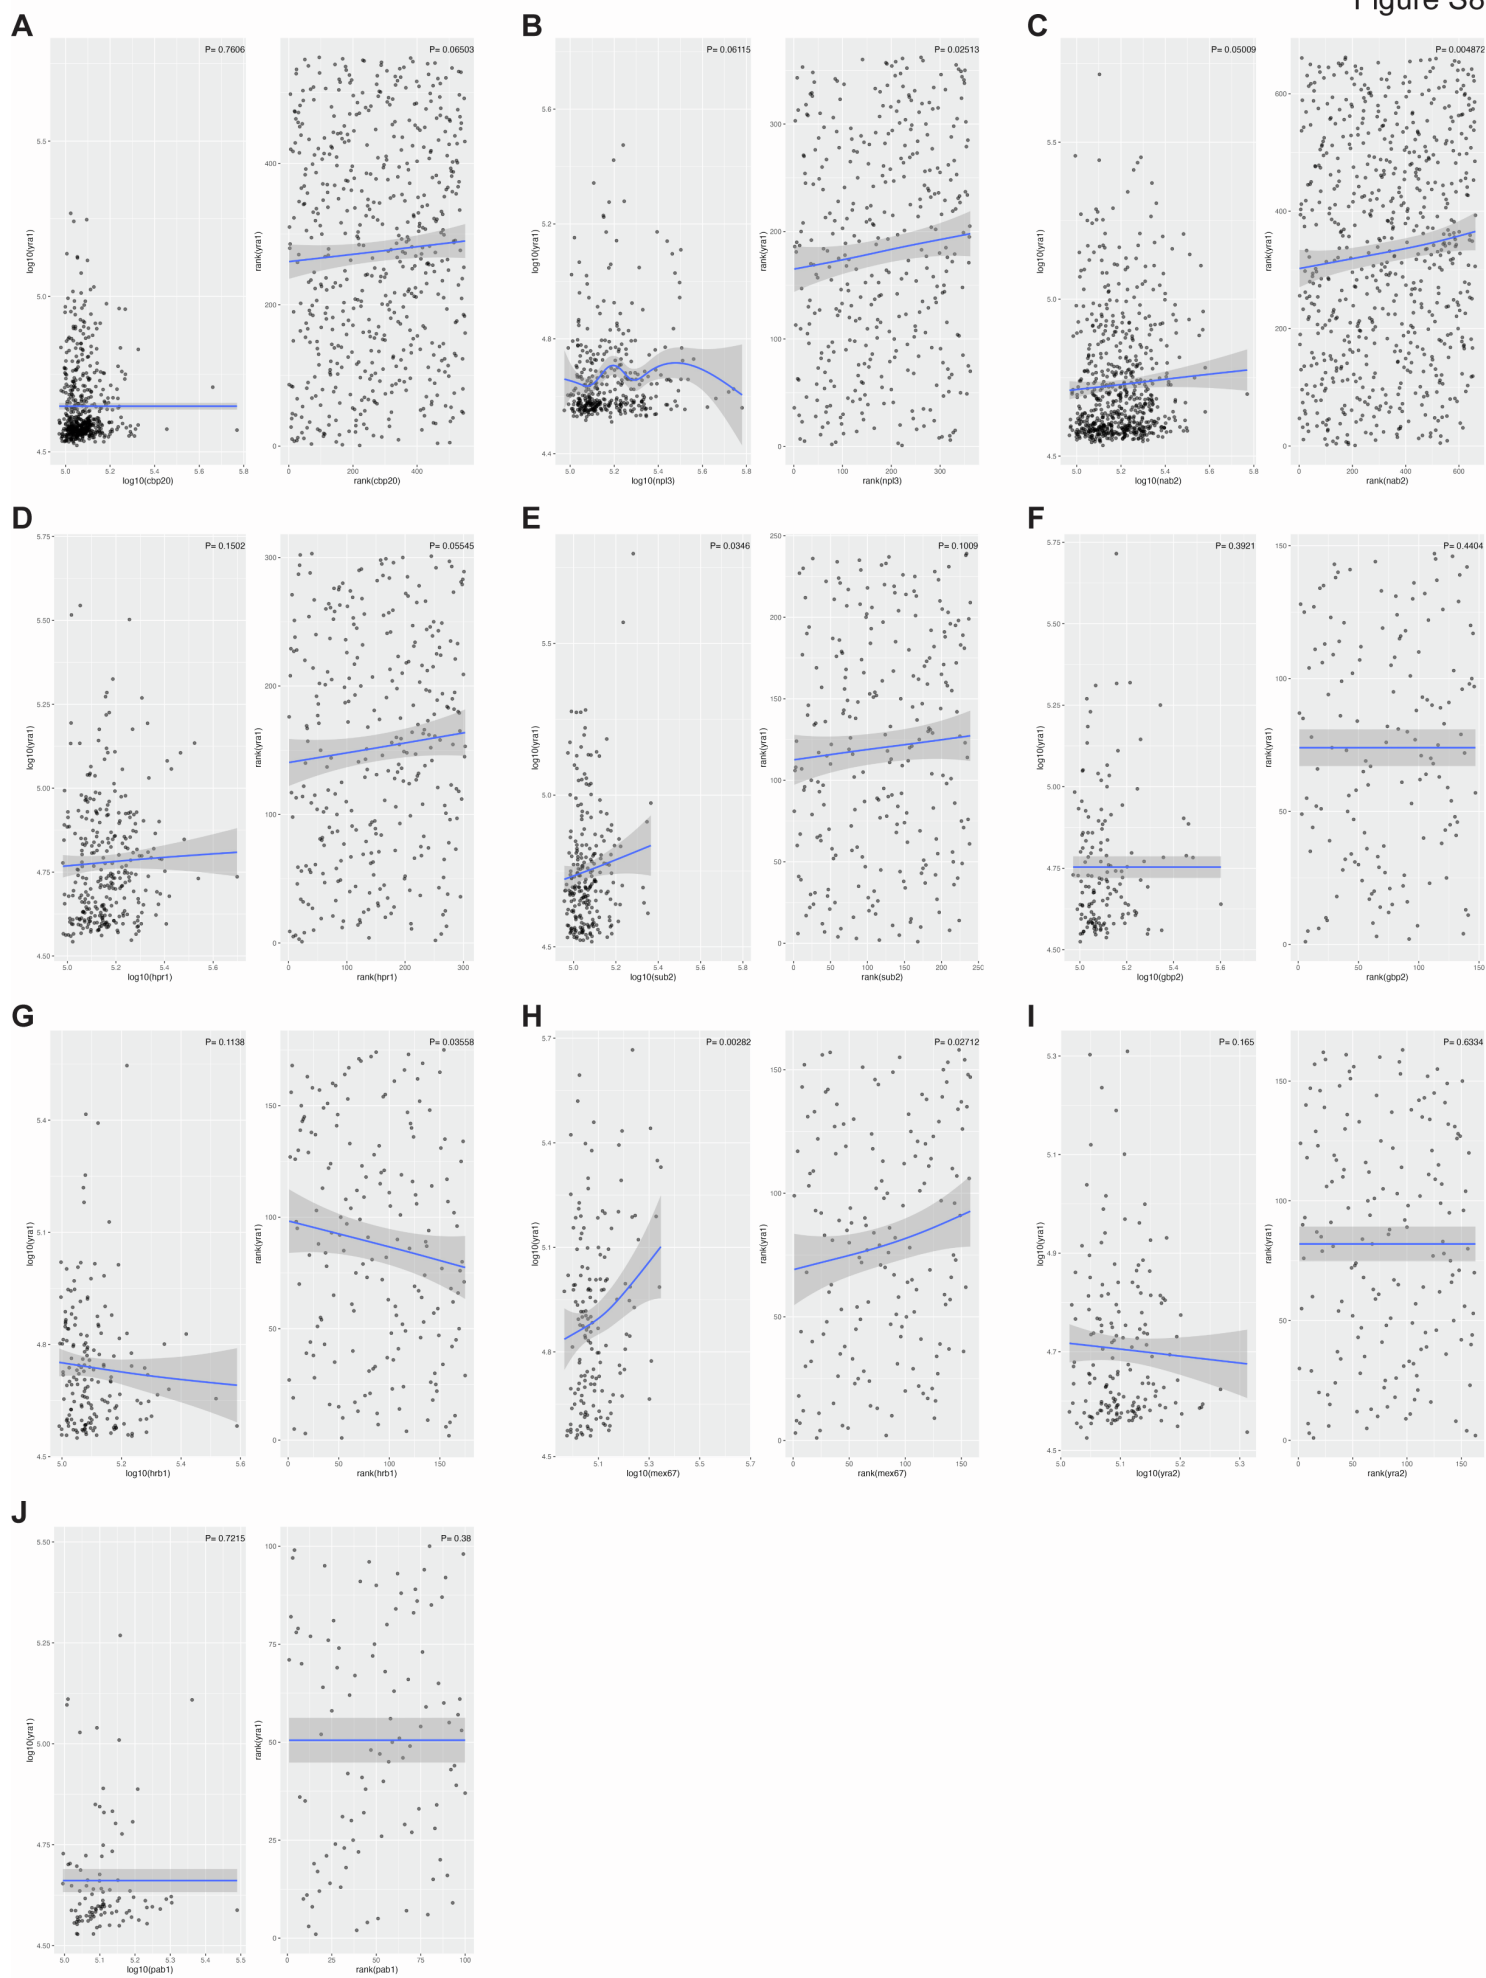

**Fig. S8. Intensity correlation of co-localized SNAPf-Yra1 and RBP-mNG spots, related to Figure 4.** The relationships between Yra1 and other RBPs were investigated within the confines of the data generated by two color mRNP-SiMPull, which relies on the capture and detection of Yra1. Hence, intensity information is known and considered for captured complexes where (i) Yra1 is detected and the other RBP is detected and (ii) Yra1 is detected but the other RBP is not detected. These data would not contain information on complexes of other types (e.g., Yra1 is not detected but the other RBP is detected). This limitation on observable combinations induces statistical dependence between the two measured intensities even if they were independent. Therefore, a generalized additive regression model (GAM) of Yra1 with each RBP was generated to test for a significant regression effect. For completeness, two GAM models were employed: one with a log and the other with a rank transformation applied to the data. Plots shows log (left panel) and rank (right panel) transformed spot intensity of co-localized SNAPf-Yra1 and RBP-mNG (A: Cbp20, B: Npl3, C: Nab2, D: Hpr1, E: Sub2, F: Gbp2, G: Hrb1, H: Mex67, I: Yra2 and J: Pab1) using pooled data from three replicates. The total numbers (n) of spots analyzed for Cbp20, Npl3, Nab2, Hpr1, Sub2, Gbp2, Hrb1, Mex67, Yra2 and Pab1 are 550, 362, 662, 303, 239, 147, 175, 158, 168 and 100, respectively.



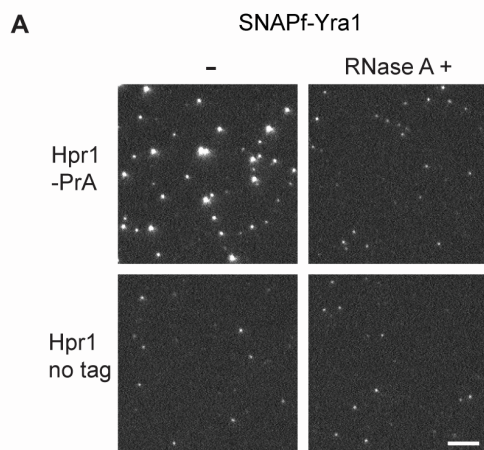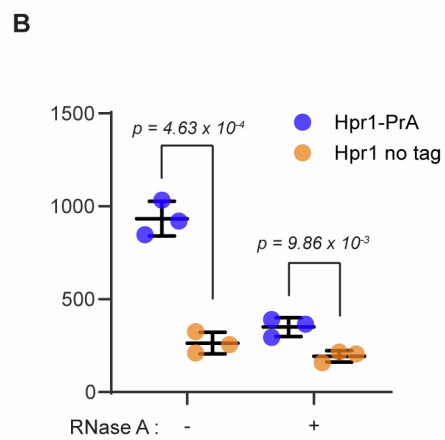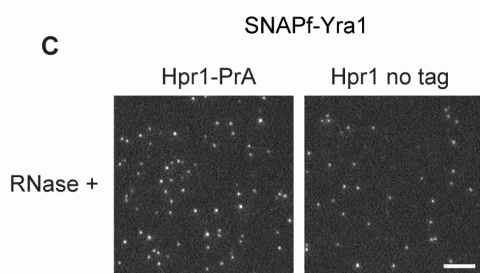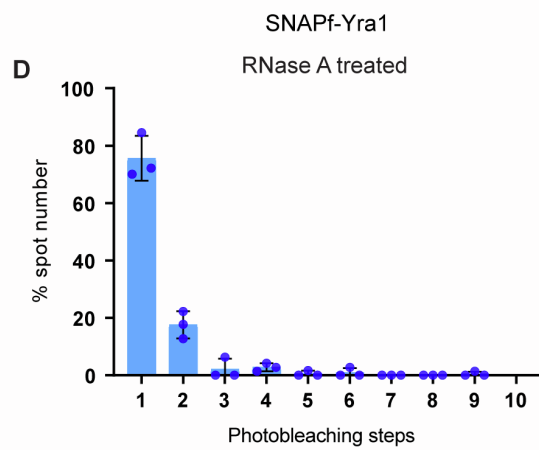

**Fig. S9. Analysis of an RNase resistant Hpr1-Yra1 complex, related to Figure 5.** (A) Representative TIRF images of SNAPf-Yra1 obtained by mRNP-SiMPull from cell lysates expressing Hpr1-PrA or untagged Hpr1 (no tag) with or without RNase A treatment. (B) Graph shows the number of detected spots in triplicate experiments with mean and standard deviation (error bar). p-values are calculated by Student's t-test. (C) Representative TIRF images of SNAPf-Yra1 obtained by mRNP-SiMPull in the presence of RNase A. (D) Graph shows photobleaching step analysis of RNase resistant SNAPf-Yra1 spots. Bars show mean data with standard deviation with dots showing individual data points in triplicate experiments. Image scale bars, 5  $\mu\text{m}$ .

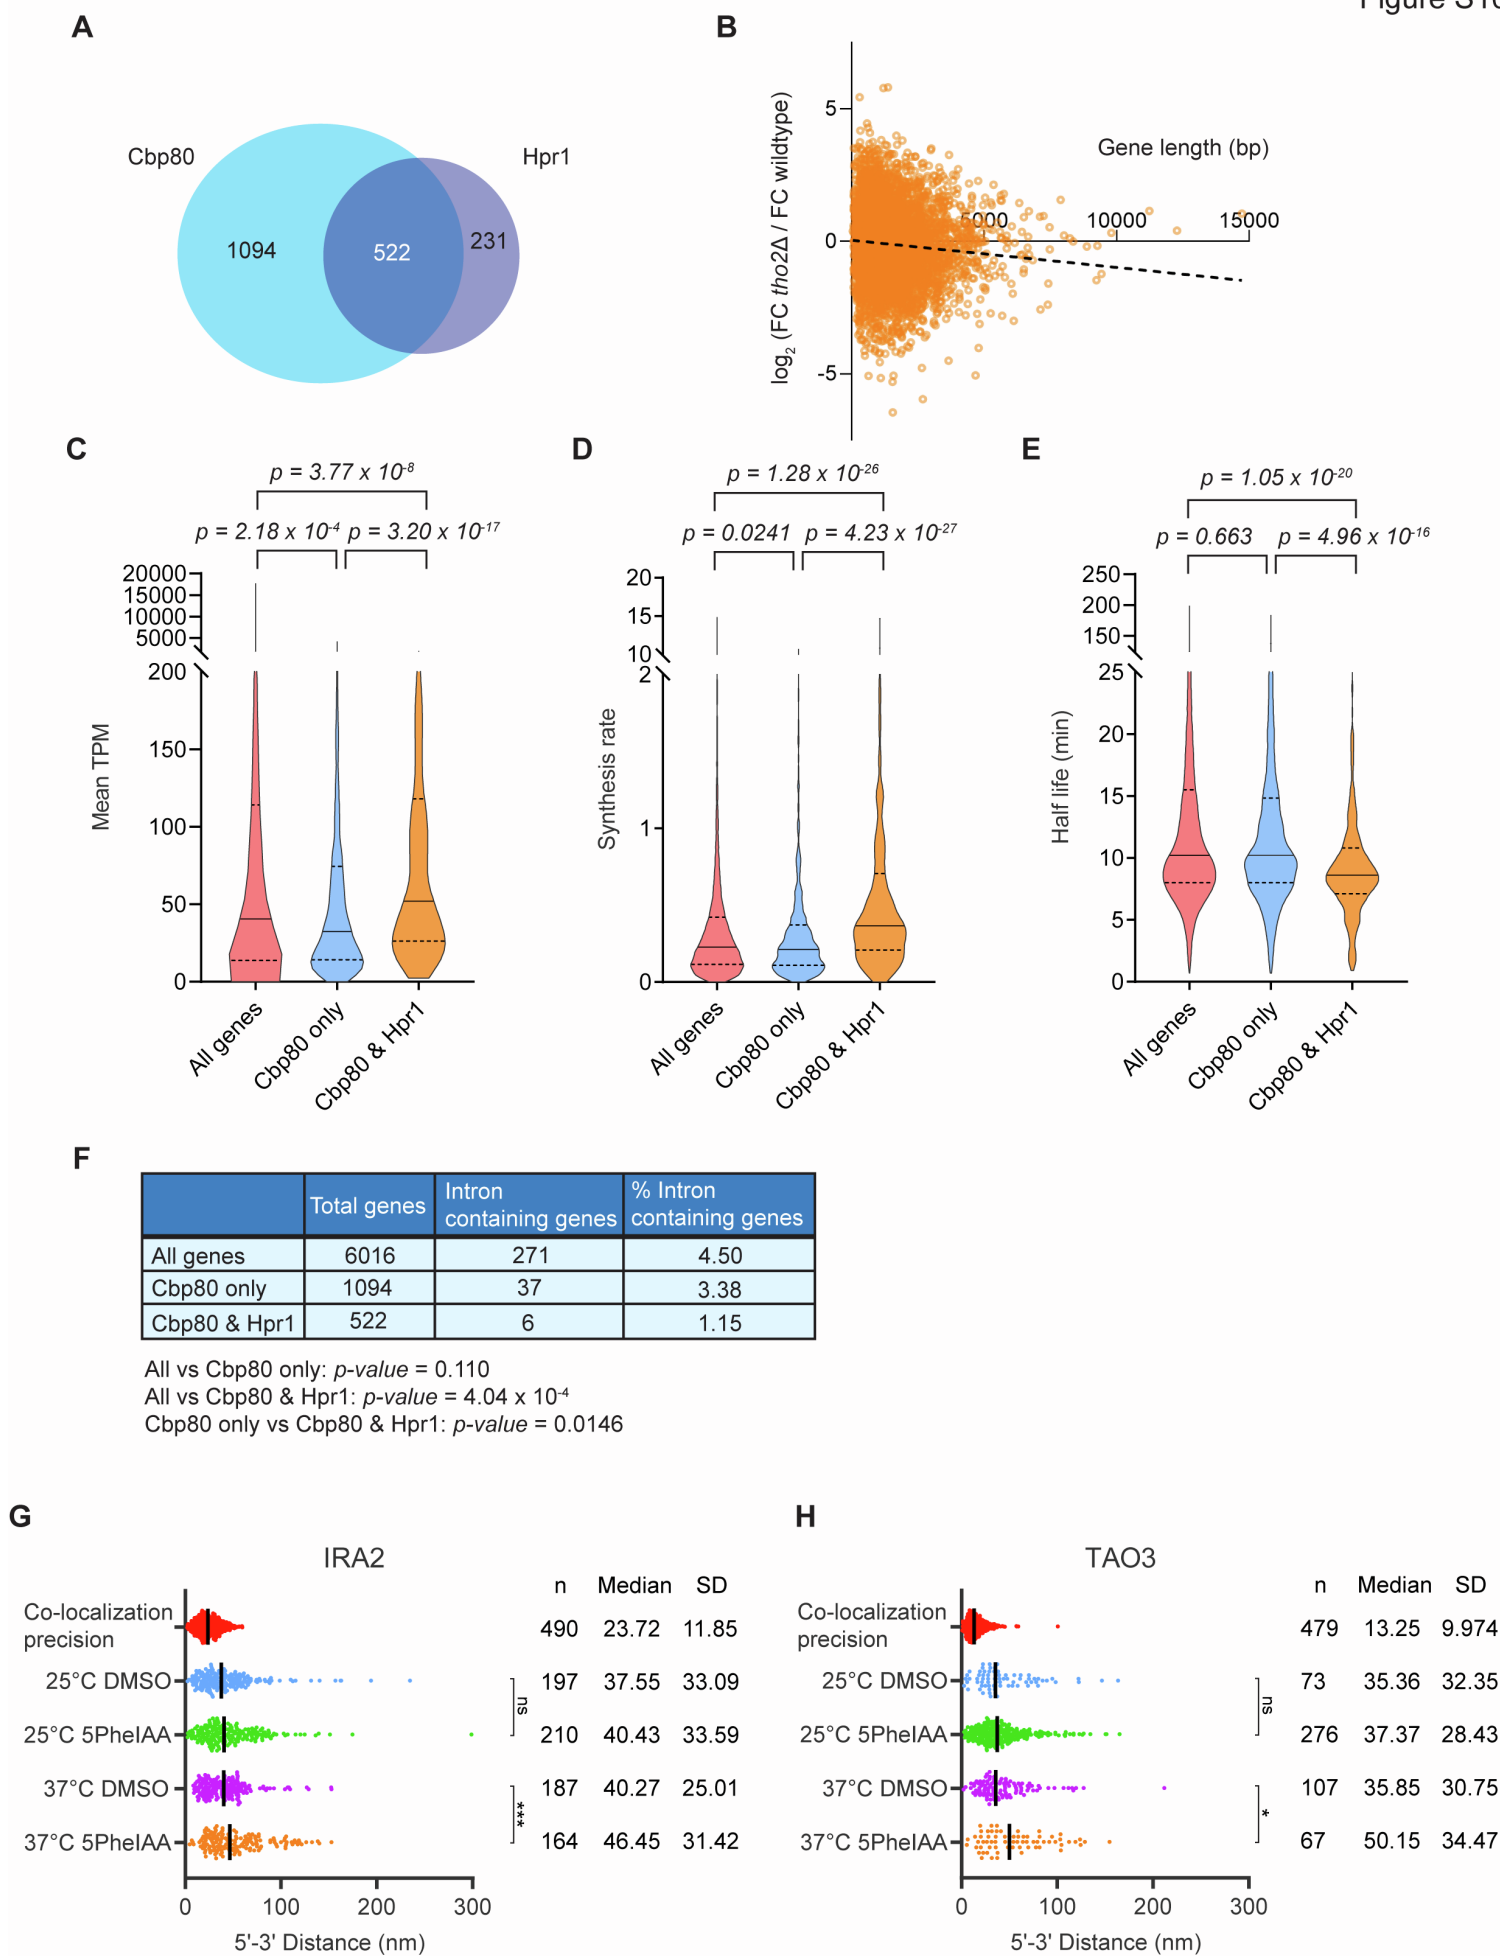



**Fig. S10. mRNP compositions with different Yra1 occupancy associated with specific transcripts features and Yra1 function in mRNP compaction, related to Figure 6.** (A) Venn diagram of gene transcripts determined to be enriched by RNA-seq in Fig. 6 and their overlap between Cbp80/Yra1 and Hpr1/Yra1 two-step pulldowns. (B) Scatter plot of gene length and the fold change ratio between *tho2Δ* and wildtype values in Cbp80-PrA/Yra1 pulldowns for each gene. Linear regression line is shown as black dotted line. (C-E) Violin plots comparing transcript features among all annotated yeast gene and genes significantly enriched in only Cbp80/Yra1 or in both Cbp80/Yra1 and Hpr1/Yra1 pulldowns, including expression level (TPM value obtained from total RNA sequencing), transcript synthesis rates, and mRNA half-life. Medians and quartiles are shown as solid and dot lines, respectively. p-values were calculated by Wilcoxon's rank sum test. (F) Fraction of intron containing genes within all genes in comparison to pulldown enriched populations. p-value was calculated by chi-squared test. (G, H) Dot plot of another replicate for distance measurement of IRA2 (G) and TAO3 (H) 5'-3' region as described in Fig 6F and G. Median and SD (standard deviation) are shown in nm. p-values were calculated using Kolmogorov-Smirnov test. ns, not sensitive. \*  $p < 0.05$ . \*\*\*  $p < 0.001$ .

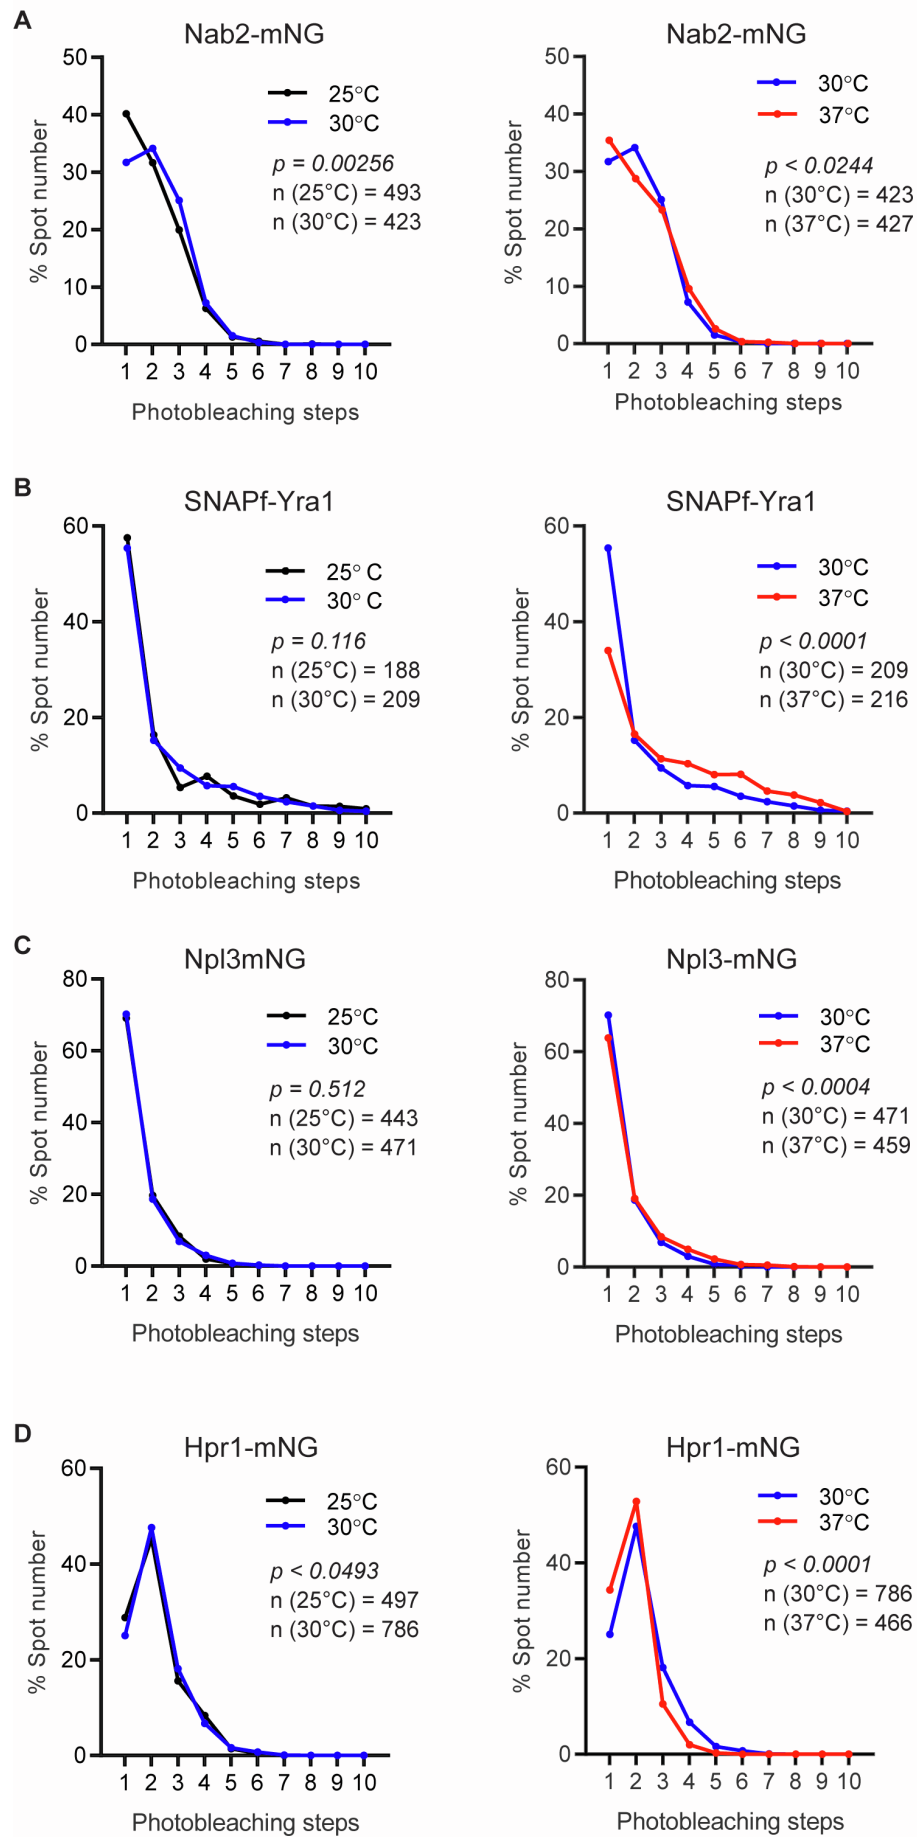

**Fig. S11. RBP stoichiometry comparison in different cell growth temperature, related to Figure 7.** Line graphs showing pairwise comparison of RBPs stoichiometry distribution (**A**: Nab2-mNG, **B**: SNAPf-Yra1, **C**: Npl3-mNG and **D**: Hpr1-mNG) by comparing uncorrected raw mean photobleaching step data from triplicate samples in different growth temperature (25°C vs 30°C and 30°C vs 37°C). p-values were calculated by a non-parametric Kolomogorov-Smirnoff [KS] two-sample tests. Average number (n) of spots analyzed per replicate experiment is indicated on each graph.

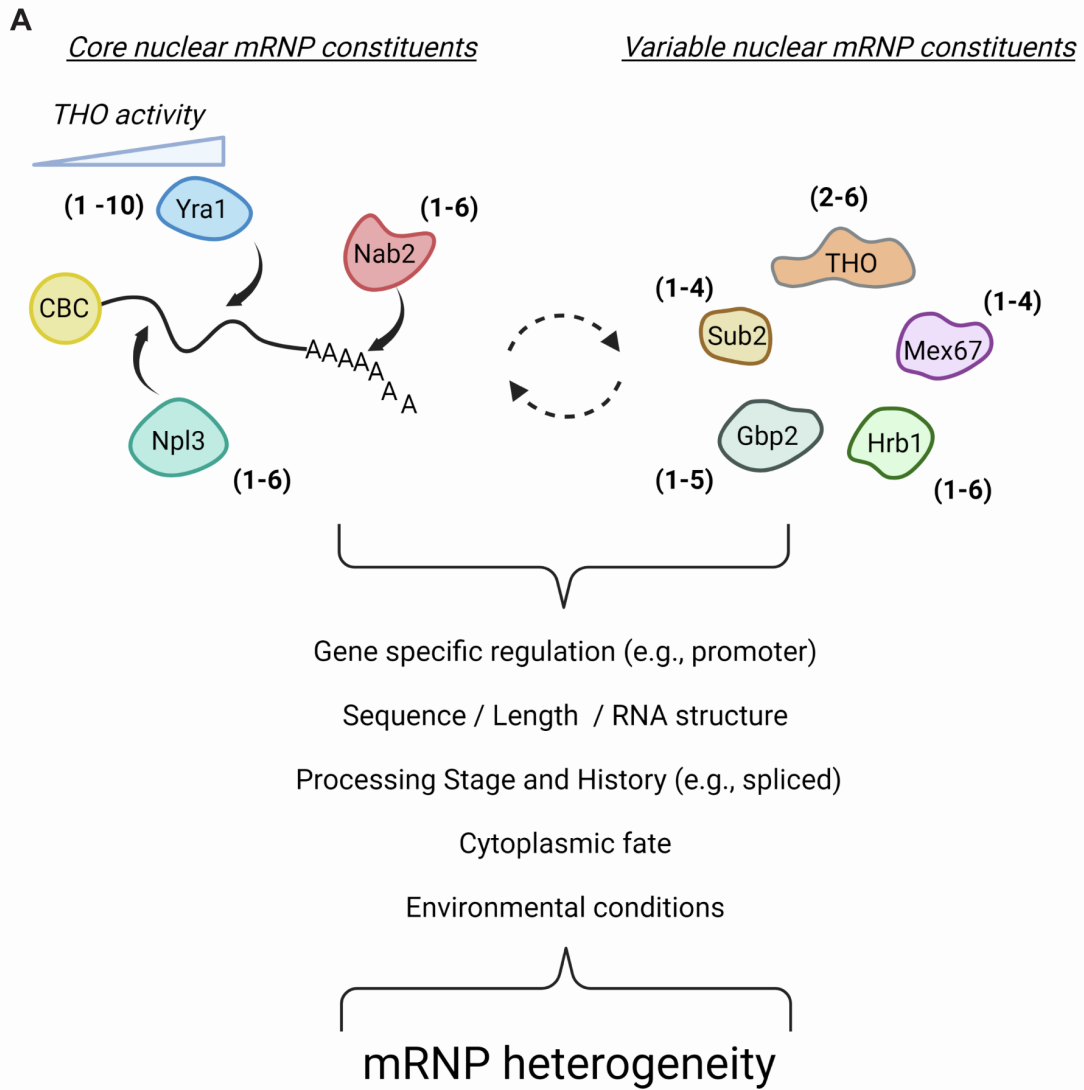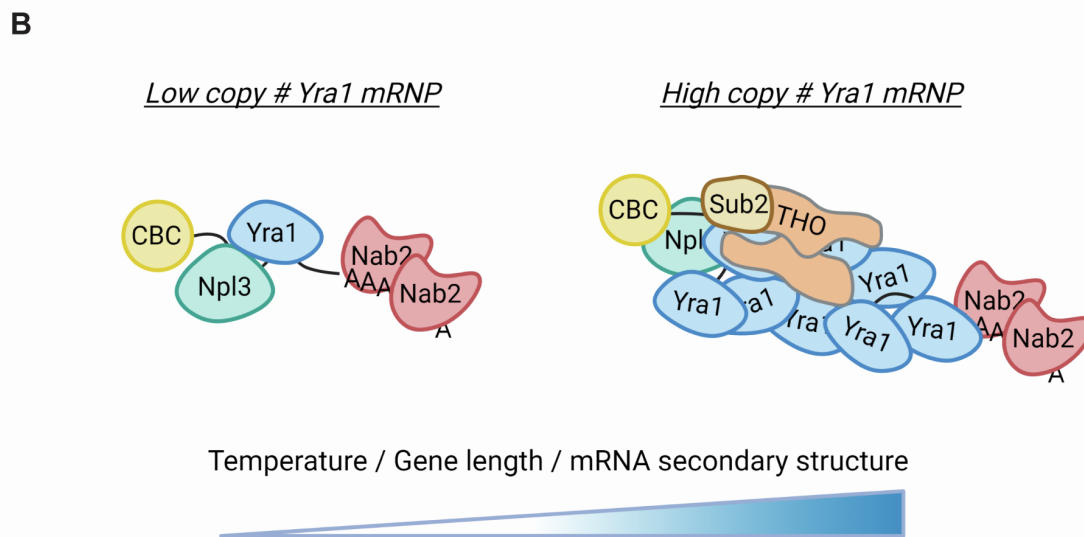

**Fig. S12. mRNA heterogeneity as defined by mRNA-SiMPull, related to conclusion.** (A) CBC capped mRNPs are composed of core components (CBC, Npl3, Nab2 and Yra1) and variable components with both fixed and varied stoichiometries. It is expected that this heterogeneity results from gene-specific regulation (e.g. promoter), transcript features (e.g., length, secondary structure), biogenesis and processing history (e.g., splicing and polyadenylation status), cytoplasmic fate (e.g., translation, transport/localization, storage), and environmental inputs (e.g., temperature). (B) Yra1 stoichiometry is altered by co-occupied THO complex function. It is expected that Yra1 stoichiometry is gene and condition dependent, acting within a protein-protein and protein-RNA interaction network to organize and compact mRNPs for nuclear export.

**Table S1:** Summary of mRNP SiMPull data. Related to Figure 2, 3, S5. Third column “Protein abundance” is from Ho et al 2018 *Cell. Syst* [S30]. The fourth column “Relative frequency of RBP bound mRNPs” is the value of fold enrichment of detected each RBP-mNG spots over the Cbp20-SNAPf-3HA spots in the same sample by mRNP-SiMPull shown in Fig. 2C. The fifth column “RBP stoichiometry on an mRNP (major fraction)” represents stoichiometries observed for an RBP above 1% from the statistical model-corrected photobleaching step data shown in Fig. 3B-L and Fig. S5B-E.

| <b>RBP</b> | <b>Description</b>                                | <b>Abundance<br/>(molecule/cell)</b> | <b>Relative fraction of RBP<br/>normalized to Cbp20</b> | <b>Stoichiometries observed<br/>(&gt;1% of population)</b> |
|------------|---------------------------------------------------|--------------------------------------|---------------------------------------------------------|------------------------------------------------------------|
| Cbp20      | Nuclear cap binding complex                       | 6111                                 | -                                                       | 1-3 molecule                                               |
| Nab2       | Nuclear poly(A)-RNA binding protein               | 8716                                 | 0.205                                                   | 1-6 molecule                                               |
| Pab1       | Cytoplasmic poly(A)-RNA binding protein           | 62422                                | 0.141                                                   | 1-3 molecule                                               |
| Npl3       | SR-like protein                                   | 34936                                | 0.933                                                   | 1-6 molecule                                               |
| Gbp2       | SR-like protein                                   | 3171                                 | 0.0233                                                  | 1-5 molecule                                               |
| Hrb1       | SR-like protein                                   | 5191                                 | 0.0311                                                  | 1-6 molecule                                               |
| Yra1       | mRNA export adapter, member TREX complex          | 26822                                | 0.14                                                    | 1-10 molecule                                              |
| Yra2       | Homolog of Yra1                                   | 3470                                 | 0.0423                                                  | 1-3 molecule                                               |
| Sub2       | DEAD-box RNA helicase, member TREX complex        | 29329                                | -                                                       | 1-4 molecule                                               |
| Hpr1       | THO/TREX complex member                           | 2556                                 | 0.0272                                                  | 2-6 molecule                                               |
| Mft1       | THO/TREX complex member                           | 3969                                 | -                                                       | 2-6 molecule                                               |
| Mex6<br>7  | mRNA export receptor                              | 6514                                 | 0.0112                                                  | 1-4 molecule                                               |
| Yth1       | Cleavage and polyadenylation factor complex (CPF) | 1922                                 | 0.00186                                                 | 1-3 molecule                                               |
| Pcf11      | Cleavage factor IA (CFIA)                         | 2800                                 | 0.00166                                                 | 1-4 molecule                                               |
| Hrp1       | Cleavage factor IB (CFIB)                         | 13717                                | 0.0211                                                  | 1-4 molecule                                               |

**Table S2:** Differentially expressed genes at different growth temperatures. Related to Figure 7 and S11.

| 25°C vs 30°C | 30°C vs 37°C                                                                   | 25°C vs 37°C                                                                                                                                                                                                                                                                                |
|--------------|--------------------------------------------------------------------------------|---------------------------------------------------------------------------------------------------------------------------------------------------------------------------------------------------------------------------------------------------------------------------------------------|
| None         | HSP26, HSP12,<br>HXK1, GSC2,<br>TPO2, BNA2,<br>BAG7, GPH1,<br>STE2, LEU1, BAT1 | HSP26, SSE2, CHA1, HXK1, GSC2, TDH1, UBI4,<br>NCW2, GSY2, HOR7, DIA1, CMK2, YOR385W,<br>HTA2, ILS1, RPS11B, RPL21A, KRR1, RPL31A,<br>RPP2B, RPS8B, LEU1, NOP7, YHB1, SBP1, GAR1,<br>THS1, FAR1, RPL15A, RPS0B, CBF5, YEF3, RPL31B,<br>RPS1A, RPS18B, RPL6A, YNL134C, RPP2A, ABP140,<br>SUI3 |

**Table S3:** see provided supplemental file.**Table S4:** List of plasmids used in this study. Related to STAR Methods.

| Plasmid # | Description                                               |
|-----------|-----------------------------------------------------------|
| pBM836    | pFA6a-SNAPf-3HA-hphMX                                     |
| pBM925    | pFA6a-mNG-HIS3MX                                          |
| pBM1002   | pFA6a-PPX-PrA-NatMX                                       |
| pBM1021   | SNAPf-YRA1 integration (URA3 pop out)                     |
| pBM1114   | mNG-YRA1-HIS3MX integration                               |
| pBM1134   | mNG-SNU13-HIS3MX integration                              |
| pBM1224   | pADH1-OsTIR1(F74G)-HIS3 integration                       |
| pBM1233   | mAID-YRA1-hphMX integration                               |
| pBM1250   | pFA6a-m3V5-mAID-KanMX                                     |
| pBM1327   | pRS316-pADE3-PrA-PPX-mNG-GST-SNAPf-3HA (URA3/CEN plasmid) |
| pBM1356   | mNG-YRA2-HIS3MX integration                               |

**Table S5:** List of oligo DNAs used in this study. Related to STAR Methods.

| #      | Sequence                                                         | Description                                    |
|--------|------------------------------------------------------------------|------------------------------------------------|
| BMO292 | AACCAGTTTTACGCACCAAGAACAAGATACGGAA<br>ATGAACCGGATCCCCGGGTAAATTA  | Forward primer for C-terminal tagging of NAB2  |
| BMO293 | TGATGTGTCATGTTCAAAAAGCTTTGAATAGGTGT<br>CTTCCGAATTCGAGCTCGTTTAAAC | Reverse primer for C-terminal tagging of NAB2  |
| BMO150 | GAGAACAATTTCGAATTGGATTCAAGAAACAAAG<br>GAAGTTCGGATCCCCGGGTAAATTA  | Forward primer for C-terminal tagging of CBP80 |
| BMO151 | AGCGGAGTGATAACGAATGTAGTCCATCCTCCGA<br>ATCTTTGAATTCGAGCTCGTTTAAAC | Reverse primer for C-terminal tagging of CBP80 |

|         |                                                                   |                                                |
|---------|-------------------------------------------------------------------|------------------------------------------------|
| BMO1799 | GAAGGAAAAGAAGTCCAAGAAAGAGAAGAAAGA<br>GAAGAAACGGATCCCCGGGTTAATTAA  | Forward primer for C-terminal tagging of NOP58 |
| BMO1800 | CGAGGGGTCACTAATTATTTAAAATGTAAAATGCA<br>TCCTTAGAATTCGAGCTCGTTTAAAC | Reverse primer for C-terminal tagging of NOP58 |
| BMO1460 | TAAAAAGGAAAAGAAGGATAAAAAGAAGAAAAG<br>TAAGGATCGGATCCCCGGGTTAATTAA  | Forward primer for C-terminal tagging of NOP56 |
| BMO1461 | AAGATGGGATATACTTTATTTTCGATTCATTGTTCC<br>TTTTAGAATTCGAGCTCGTTTAAAC | Reverse primer for C-terminal tagging of NOP56 |
| BMO1556 | TGGTGGTTGTAGTTTACAGATCTCTTATGCTAGAC<br>GTGATCGGATCCCCGGGTTAATTAA  | Forward primer for C-terminal tagging of GBP2  |
| BMO734  | CATAAAGTACACAGGTCATGGTTCGGTTGGTGCTT<br>AGGAAGAATTCGAGCTCGTTTAAAC  | Reverse primer for C-terminal tagging of GBP2  |
| BMO153  | TTTCGATGAAGAAAGAGAAGATGATAACTACGTA<br>CCTCAGCGGATCCCCGGGTTAATTAA  | Forward primer for C-terminal tagging of CBP20 |
| BMO154  | TCTGTGTGTAGAATCTTTCTCAGATATAAATTGAT<br>TGATTGAATTCGAGCTCGTTTAAAC  | Reverse primer for C-terminal tagging of CBP20 |
| BMO1728 | TGGGGGTTGTGATTTGGATATATCGTACGCTAAAC<br>GCCTCCGGATCCCCGGGTTAATTAA  | Forward primer for C-terminal tagging of HRB1  |
| BMO732  | AGATCCAATAGGTGAGAAAGTATATAGATCGAGA<br>GTAGTTGAATTCGAGCTCGTTTAAAC  | Reverse primer for C-terminal tagging of HRB1  |
| BMO1617 | TTCGAACATTTCTAATGGTTCATCTACCCAAGATA<br>TGAAACGGATCCCCGGGTTAATTAA  | Forward primer for C-terminal tagging of HPR1  |
| BMO1618 | TTTCTTATCAGTTTAAAATTTCTATTAAGAGGATA<br>ATTTAGAATTCGAGCTCGTTTAAAC  | Reverse primer for C-terminal tagging of HPR1  |
| BMO601  | CAGAACCAGAGATGCTCCACGTGAAAGATCACCA<br>ACCAGGCGGATCCCCGGGTTAATTAA  | Forward primer for C-terminal tagging of NPL3  |
| BMO602  | TAATTTCTCCTTTTTTTTTTCTCAACTATATAAATGG<br>CTTAGAATTCGAGCTCGTTTAAAC | Reverse primer for C-terminal tagging of NPL3  |
| BMO128  | TAGCATGAATGGCATCCCTAGAGAAGCATTGTG<br>CAGTTCCGGATCCCCGGGTTAATTAA   | Forward primer for C-terminal tagging of MEX67 |
| BMO129  | AAAGCATGCTGCTGTTTCGGAACGTGACGAAAACA<br>GTAGCTGAATTCGAGCTCGTTTAAAC | Reverse primer for C-terminal tagging of MEX67 |
| BMO1099 | GTCTTTCAAAAAGGAGCAAGAACAACAACTGAG<br>CAAGCTCGGATCCCCGGGTTAATTAA   | Forward primer for C-terminal tagging of PAB1  |
| BMO1100 | GTTTGTTGAGTAGGGAAGTAGGTGATTACATAGA<br>GCATTAGAATTCGAGCTCGTTTAAAC  | Reverse primer for C-terminal tagging of PAB1  |



|         |                                                                  |                                                                                                     |
|---------|------------------------------------------------------------------|-----------------------------------------------------------------------------------------------------|
| BMO2106 | CAAGGTCGGTTTGGATGACTTAAAGAAATTGGTC<br>ACAAAACGGATCCCCGGGTTAATTAA | Forward primer for C-terminal tagging of PCF11                                                      |
| BMO2107 | AGTTATTAAATTTAAATGTATATATGCAGTTCTGC<br>TCTTAGAATTCGAGCTCGTTTAAAC | Reverse primer for C-terminal tagging of PCF11                                                      |
| BMO2234 | AAAGGAAAGGCGTTTAAACGCAATTATAAACGGT<br>GAAGTTCGGATCCCCGGGTTAATTAA | Forward primer for C-terminal tagging of YTH1                                                       |
| BMO2235 | ATGTCTATGAAATCGAAAACCCCCAGCCATGCAT<br>AGATCAGAATTCGAGCTCGTTTAAAC | Reverse primer for C-terminal tagging of YTH1                                                       |
| BMO2230 | ATACAATAGACGTAATAATGGCTACCATCCATAT<br>AATAGGCGGATCCCCGGGTTAATTAA | Forward primer for C-terminal tagging of HRP1                                                       |
| BMO2231 | AAAAC TTTTCTCTAGTTTCTACACTTTTCTTTTTT<br>TTTAGAATTCGAGCTCGTTTAAAC | Reverse primer for C-terminal tagging of HRP1                                                       |
| BMO1911 | AAGCGATTTTAGTGCCTTCTCTGTTGAAGAAG<br>TAAAACGGATCCCCGGGTTAATTAA    | Forward primer for C-terminal tagging of MFT1                                                       |
| BMO1912 | CCTTTTCTATTTAGTAAGAGCTATGCATTATACGT<br>GGTCAGAATTCGAGCTCGTTTAAAC | Reverse primer for C-terminal tagging of MFT1                                                       |
| BMO669  | CCCAGAAGAAGGCATTGATCCGTCCACTTATTTG<br>AATAATCGGATCCCCGGGTTAATTAA | Forward primer for C-terminal tagging of SUB2                                                       |
| BMO670  | TATATAATCTATATAAAAACGTATCTTTTTTCCTTT<br>ATTAGAATTCGAGCTCGTTTAAAC | Reverse primer for C-terminal tagging of SUB2                                                       |
| BMO874  | GAGAGATGGTGGCTGGGGTAACAGAGGTCGTTCA<br>AACTATCGGATCCCCGGGTTAATTAA | Forward primer for C-terminal tagging of DBP2                                                       |
| BMO875  | TTATTAATAGAGATGAATGAATTGAATCACTTTGA<br>CTTCAGAATTCGAGCTCGTTTAAAC | Reverse primer for C-terminal tagging of DBP2                                                       |
| BMO1953 | GGGCAGTGCATGAAACTG                                               | Forward primer for amplifying tom1Δ::KanMX<br>fragment from the tho2Δ strain in deletion collection |
| BMO1954 | CCAGAGTCTCCTCCACAATC                                             | Reverse primer for amplifying tom1Δ::KanMX<br>fragment from the tho2Δ strain in deletion collection |
| BMO2088 | CCACTGTTCTCGTGTAGTGC                                             | Forward primer for amplifying tho2Δ::KanMX<br>fragment from the tho2Δ strain in deletion collection |
| BMO1626 | GGGTCGTATCGCTAAGAAC                                              | Reverse primer for amplifying tho2Δ::KanMX<br>fragment from the tho2Δ strain in deletion collection |

**Table S6:** see provided supplemental file.

## Supplemental References:

- [S1]. Fortes, P., Kufel, J., Fornerod, M., Polycarpou-Schwarz, M., Lafontaine, D., Tollervey, D., and Mattaj, I.W. (1999). Genetic and physical interactions involving the yeast nuclear cap-binding complex. *Mol Cell Biol* *19*, 6543–6553. 10.1128/MCB.19.10.6543.
- [S2]. Rambout, X., and Maquat, L.E. (2020). The nuclear cap-binding complex as choreographer of gene transcription and pre-mRNA processing. *Genes Dev* *34*, 1113–1127. 10.1101/gad.339986.120.
- [S3]. Lee, M.S., Henry, M., and Silver, P.A. (1996). A protein that shuttles between the nucleus and the cytoplasm is an important mediator of RNA export. *Genes Dev* *10*, 1233–1246. 10.1101/gad.10.10.1233.
- [S4]. Dermody, J.L., Dreyfuss, J.M., Villén, J., Ogundipe, B., Gygi, S.P., Park, P.J., Ponticelli, A.S., Moore, C.L., Buratowski, S., and Bucheli, M.E. (2008). Unphosphorylated SR-like protein Npl3 stimulates RNA polymerase II elongation. *PLoS One* *3*, e3273. 10.1371/journal.pone.0003273.
- [S5]. Kress, T.L., Krogan, N.J., and Guthrie, C. (2008). A single SR-like protein, Npl3, promotes pre-mRNA splicing in budding yeast. *Mol Cell* *32*, 727–734. 10.1016/j.molcel.2008.11.013.
- [S6]. Sandhu, R., Sinha, A., and Montpetit, B. (2021). The SR-protein Npl3 is an essential component of the meiotic splicing regulatory network in *Saccharomyces cerevisiae*. *Nucleic Acids Res* *49*, 2552–2568. 10.1093/nar/gkab071.
- [S7]. Bucheli, M.E., He, X., Kaplan, C.D., Moore, C.L., and Buratowski, S. (2007). Polyadenylation site choice in yeast is affected by competition between Npl3 and polyadenylation factor CFI. *RNA* *13*, 1756–1764. 10.1261/rna.607207.
- [S8]. Holmes, R.K., Tuck, A.C., Zhu, C., Dunn-Davies, H.R., Kudla, G., Clauder-Munster, S., Granneman, S., Steinmetz, L.M., Guthrie, C., and Tollervey, D. (2015). Loss of the Yeast SR Protein Npl3 Alters Gene Expression Due to Transcription Readthrough. *PLoS Genet* *11*, e1005735. 10.1371/journal.pgen.1005735.
- [S9]. Keil, P., Wulf, A., Kachariya, N., Reuscher, S., Hühn, K., Silbern, I., Altmüller, J., Keller, M., Stehle, R., Zarnack, K., et al. (2023). Npl3 functions in mRNP assembly by recruitment of mRNP components to the transcription site and their transfer onto the mRNA. *Nucleic Acids Res* *51*, 831–851. 10.1093/nar/gkac1206.
- [S10]. Hackmann, A., Wu, H., Schneider, U.-M., Meyer, K., Jung, K., and Krebber, H. (2014). Quality control of spliced mRNAs requires the shuttling SR proteins Gbp2 and Hrb1. *Nat Commun* *5*, 3123. 10.1038/ncomms4123.
- [S11]. Schuller, S.K., Schuller, J.M., Prabu, J.R., Baumgärtner, M., Bonneau, F., Basquin, J., and Conti, E. (2020). Structural insights into the nucleic acid remodeling mechanisms of the yeast THO-Sub2 complex. *Elife* *9*, e61467. 10.7554/eLife.61467.
- [S12]. Chávez, S., Beilharz, T., Rondón, A.G., Erdjument-Bromage, H., Tempst, P., Svejstrup, J.Q., Lithgow, T., and Aguilera, A. (2000). A protein complex containing Tho2, Hpr1, Mft1 and a novel protein, Thp2, connects transcription elongation with mitotic recombination in *Saccharomyces cerevisiae*. *EMBO J* *19*, 5824–5834. 10.1093/emboj/19.21.5824.
- [S13]. Meinel, D.M., Burkert-Kautzsch, C., Kieser, A., O’Duibhir, E., Siebert, M., Mayer, A., Cramer, P., Söding, J., Holstege, F.C.P., and Sträßer, K. (2013). Recruitment of TREX to the transcription machinery by its

direct binding to the phospho-CTD of RNA polymerase II. *PLoS Genet* 9, e1003914. 10.1371/journal.pgen.1003914.

[S14]. Strässer, K., Masuda, S., Mason, P., Pfannstiel, J., Oppizzi, M., Rodriguez-Navarro, S., Rondón, A.G., Aguilera, A., Struhl, K., Reed, R., et al. (2002). TREX is a conserved complex coupling transcription with messenger RNA export. *Nature* 417, 304–308. 10.1038/nature746.

[S15]. Strässer, K., and Hurt, E. (2001). Splicing factor Sub2p is required for nuclear mRNA export through its interaction with Yra1p. *Nature* 413, 648–652. 10.1038/35098113.

[S16]. Stutz, F., Bachi, A., Doerks, T., Braun, I.C., Séraphin, B., Wilm, M., Bork, P., and Izaurralde, E. (2000). REF, an evolutionary conserved family of hnRNP-like proteins, interacts with TAP/Mex67p and participates in mRNA nuclear export. *RNA* 6, 638–650. 10.1017/s1355838200000078.

[S17]. Zenklusen, D., Vinciguerra, P., Wyss, J.-C., and Stutz, F. (2002). Stable mRNP formation and export require cotranscriptional recruitment of the mRNA export factors Yra1p and Sub2p by Hpr1p. *Mol Cell Biol* 22, 8241–8253. 10.1128/MCB.22.23.8241-8253.2002.

[S18]. Hurt, E., Luo, M.-J., Röther, S., Reed, R., and Strässer, K. (2004). Cotranscriptional recruitment of the serine-arginine-rich (SR)-like proteins Gbp2 and Hrb1 to nascent mRNA via the TREX complex. *Proc Natl Acad Sci U S A* 101, 1858–1862. 10.1073/pnas.0308663100.

[S19]. Zenklusen, D., Vinciguerra, P., Strahm, Y., and Stutz, F. (2001). The yeast hnRNP-Like proteins Yra1p and Yra2p participate in mRNA export through interaction with Mex67p. *Mol Cell Biol* 21, 4219–4232. 10.1128/MCB.21.13.4219-4232.2001.

[S20]. Kumar, A., Clerici, M., Muckenfuss, L.M., Passmore, L.A., and Jinek, M. (2019). Mechanistic insights into mRNA 3'-end processing. *Curr Opin Struct Biol* 59, 143–150. 10.1016/j.sbi.2019.08.001.

[S21]. Turtola, M., Manav, M.C., Kumar, A., Tudek, A., Mroczek, S., Krawczyk, P.S., Dziembowski, A., Schmid, M., Passmore, L.A., Casañal, A., et al. (2021). Three-layered control of mRNA poly(A) tail synthesis in *Saccharomyces cerevisiae*. *Genes Dev* 35, 1290–1303. 10.1101/gad.348634.121.

[S22]. Strässer, K., and Hurt, E. (2000). Yra1p, a conserved nuclear RNA-binding protein, interacts directly with Mex67p and is required for mRNA export. *EMBO J* 19, 410–420. 10.1093/emboj/19.3.410.

[S23]. Gwizdek, C., Iglesias, N., Rodriguez, M.S., Ossareh-Nazari, B., Hobeika, M., Divita, G., Stutz, F., and Dargemont, C. (2006). Ubiquitin-associated domain of Mex67 synchronizes recruitment of the mRNA export machinery with transcription. *Proc Natl Acad Sci U S A* 103, 16376–16381. 10.1073/pnas.0607941103.

[S24]. Iglesias, N., Tutucci, E., Gwizdek, C., Vinciguerra, P., Von Dach, E., Corbett, A.H., Dargemont, C., and Stutz, F. (2010). Ubiquitin-mediated mRNP dynamics and surveillance prior to budding yeast mRNA export. *Genes Dev* 24, 1927–1938. 10.1101/gad.583310.

[S25]. Gilbert, W., and Guthrie, C. (2004). The Glc7p nuclear phosphatase promotes mRNA export by facilitating association of Mex67p with mRNA. *Mol Cell* 13, 201–212. 10.1016/s1097-2765(04)00030-9.

[S26]. Segref, A., Sharma, K., Doye, V., Hellwig, A., Huber, J., Lührmann, R., and Hurt, E. (1997). Mex67p, a novel factor for nuclear mRNA export, binds to both poly(A)<sup>+</sup> RNA and nuclear pores. *EMBO J* 16, 3256–3271. 10.1093/emboj/16.11.3256.

- [S27]. Strässer, K., Bassler, J., and Hurt, E. (2000). Binding of the Mex67p/Mtr2p heterodimer to FXFG, GLFG, and FG repeat nucleoporins is essential for nuclear mRNA export. *J Cell Biol* *150*, 695–706. 10.1083/jcb.150.4.695.
- [S28]. Tuck, A.C., and Tollervey, D. (2013). A transcriptome-wide atlas of RNP composition reveals diverse classes of mRNAs and lncRNAs. *Cell* *154*, 996–1009. 10.1016/j.cell.2013.07.047.
- [S29]. Baejen, C., Torkler, P., Gressel, S., Essig, K., Söding, J., and Cramer, P. (2014). Transcriptome maps of mRNP biogenesis factors define pre-mRNA recognition. *Mol Cell* *55*, 745–757. 10.1016/j.molcel.2014.08.005.
- [S30]. Ho, B., Baryshnikova, A., and Brown, G.W. (2018). Unification of Protein Abundance Datasets Yields a Quantitative *Saccharomyces cerevisiae* Proteome. *Cell Syst* *6*, 192-205.e3. 10.1016/j.cels.2017.12.004.
